# Supplementary material for: SO2, silicate clouds, but no CH4 detected in a warm Neptune
Source: Springer Nature journal article supplement (doi:10.1038/s41586-023-06849-0), 2023-11-15
Supplement: 41586_2023_6849_MOESM1_ESM.pdf [file 41586_2023_6849_MOESM1_ESM.pdf]

## Supplementary information

---

# **SO<sub>2</sub>, silicate clouds, but no CH<sub>4</sub> detected in a warm Neptune**

---

In the format provided by the  
authors and unedited

# Supplementary information

## 1. JWST MIRI observations and data processing

WASP-107b was observed with the Low-Resolution Spectrometer (LRS<sup>35</sup>) of the Mid-Infrared Instrument (MIRI<sup>36</sup>) on board the JWST on the 19–20 January 2023. The data is part of the GTO program under program identifier (PID) 1280 (P.I. P.O. Lagage). The observation started on 19 January at 18:25 UT, in a time-series of 4546 integrations lasting 8h14m, starting approximately 4h50m before the centre of the WASP-107b transit. This total time duration includes the out-of-transit time,  $\sim 30$  min of detector settling time, and additional time to accommodate scheduling flexibility.

The data was acquired using the SLITLESSPRISM subarray and the FASTR1 readout mode<sup>35,37</sup>. The integrations consisted of 40 groups (or frames as the MIRI instrument uses 1 frame per group). With this particular number of frames, a maximum signal level of about 75% of the saturation level is reached, ensuring that a photon-noise limited signal is measured while still avoiding the strongest non-linearity effects occurring for signals approaching saturation.

The data processing began with the uncalibrated raw data products retrieved from the Barbara A. Mikulski Archive for Space Telescopes (MAST; <https://archive.stsci.edu/>). In order to ensure results that are not influenced by the calibration or potential uncorrected instrumental systematics, we performed three independent data reductions and light curve analyses. In short, our reductions are based on the CASCADE reduction package<sup>11</sup>, that was used both for the JWST MIRI and the HST/WFC3 data (Sect. 1.1), the Eureka! package<sup>12</sup> (Sect. 1.2) and the TEATRO package (see Sect. 1.3). To ensure a correct relative flux calibration, we derived and applied a specific non-linearity correction of the ramps (see Sect. 1.4). The outcomes of the three data reduction methods are compared in Sect. 1.5.

Each method extracted 51 spectroscopic light curves between 4.61 and 11.83  $\mu\text{m}$  with a 0.15  $\mu\text{m}$  bin width. Suppl. Inf. Figure 1 shows the CASCADE MIRI/LRS transit observation of WASP-107b. The shorter wavelength channels ( $< 7 \mu\text{m}$ ) show the strongest (downward) drift at the start of the spectral time series, consistent with the behaviour observed in the MIRI/LRS data of the transit of L168-9b<sup>11</sup>. At the longest wavelengths ( $> 11 \mu\text{m}$ ), a slight upward drift can be observed, although at a much lower amplitude compared to the short wavelength channels. Note that longward of 10  $\mu\text{m}$ , the noise substantially increases due to a decreasing response of the instrument.

The SLITLESSPRISM subarray covers parts of 3 distinctive regions on the MIRI imager detector. For wavelengths shorter than 10.5  $\mu\text{m}$  the spectra fall within the Lyot coronagraphic subarray. For wavelengths between 10.5  $\mu\text{m}$  and about 11  $\mu\text{m}$  the LRS spectra fall on an area of the detector covered by the focal plane mask, and at longer wavelengths in the subarray of one of the 4 quadrant phase mask coronagraphs. Prior operations of the MIRI imager detector (i.e. Exposures with different duration and filter wheel position or idling operation), may impact the



Suppl. Inf. – Figure 1: **Band-average time series of the JWST MIRI/LRS observations of the WASP-107b transit.** Panel (a): Normalised spectral time series data. Panel (b): Normalised light curve of the WASP-107b transit integrated between  $4.61 \mu\text{m}$  to  $11.83 \mu\text{m}$ . Panel (c): Change in full-width half maximum (FWHM) in the spectral trace between detector rows 280 and 390, corresponding to the shortest wavelengths. Panel (d): Change in cross-dispersion position of the spectral trace. The dashed lines are drawn to indicate the value to expect in case of no variations in values of the plotted data.

38 detector in the specific regions differently<sup>40</sup>, and could create calibration offsets and extra noise.  
 39 However, we find no such effects in our data.

Each spectroscopic light-curve as well as the band-averaged light-curve were fitted by a transit model. We fixed the orbital period  $P = 5.7214$  days<sup>1</sup> and derived the semi-major axis, inclination and mid-transit time from fitting the band-averaged light curve. The free parameters for the spectral light curve fitting were the ratio of the planet radius over the stellar radius,  $R_p/R_*$ , the instrumental systematics parameters and the limb-darkening coefficients. The transit ephemeris were taken from ref. 42, other system parameters from ref. 43, and quadratic limb-darkening coefficients computed with the `EXOTETHYS` package<sup>44</sup>, using the parameterised quadratic parameters from ref. 45. The parameters retrieved from the band-averaged light curve fitting are presented in Suppl. Inf. Table 1.

Suppl. Inf. – Table 1: **Parameters retrieved from the band-averaged light curve fitting.** Listed are the values retrieved with the `Eureka!` and `TEATRO` reduction methods. `CASCADE` uses the `TEATRO` output parameters. The mid-transit timing  $T_0$  is the Barycentric Modified Julian date / Temps Dynamique Barycentrique (BMJD\_TDB) time system.

| Parameter                        | Eureka!                                                       | TEATRO                                |
|----------------------------------|---------------------------------------------------------------|---------------------------------------|
| Orbital period [d]               | 5.7214742 <sup>(a)</sup>                                      | 5.7214904 <sup>(b)</sup>              |
| Planetary radius $R_p$ [ $R_*$ ] | $0.14336^{+6.55154 \times 10^{-5}}_{-6.75549 \times 10^{-5}}$ | $0.14341 \pm 0.00011$                 |
| Semi-major axis $a$ [ $R_*$ ]    | $18.10815^{+0.00710}_{-0.00712}$                              | 18.0249 <sup>(c)</sup>                |
| Inclination $i$ [deg]            | $89.59059^{+0.00837}_{-0.00851}$                              | $89.516 \pm 0.016$                    |
| Mid-transit timing $T_0$ [d]     | $59963.9687968^{+1.30 \times 10^{-5}}_{-1.27 \times 10^{-5}}$ | $59963.968763 \pm 1.6 \times 10^{-5}$ |
| Limb-darkening coefficient $u_1$ | $0.095^{+0.0017}_{-0.0015}$                                   | $0.089 \pm 0.014$                     |
| Limb-darkening coefficient $u_2$ | $0.017^{+0.059}_{-0.053}$                                     | $0.042 \pm 0.029$                     |

<sup>(a)</sup> Fixed<sup>2</sup>.

<sup>(b)</sup> Fixed<sup>42</sup>.

<sup>(c)</sup> Fixed, computed from the orbital period<sup>42</sup> and the stellar mass and radius<sup>1</sup>.

## 1.1. `CASCADE` data reduction setup

The first method for spectral extraction and time series analysis was based on the Calibration of trAnsit Spectroscopy using CAusal Data (`CASCADE`) data reduction package developed within the *Exoplanet Atmosphere New Emission Transmission Spectra Analysis* (`EXOPLANETS-A`) Horizon-2020 program and described in detail in ref. 11. For the basic data calibration and spectral extraction, we used the `jwst` calibration pipeline version 1.9.4 and reference files from the JWST Calibration Reference Data System (`CRDS`) using context 1030. We followed the procedure described in ref. 11 with a few exceptions. We found that the dark correction applied in context version 1030

57 was not optimal, as it introduced an excess scatter on the detector ramps. We, therefore, overrode  
58 the dark reference file with a custom one, which we derived by taking the standard CRDS dark  
59 file and running a median smoothing (or running median) to remove the observed excess scatter  
60 in the dark estimate. For a complete discussion on our linearity correction we refer to Sect. 1.4.  
61 Secondly, we used the reset switch charge decay (RSCD) step in the Detector1 pipeline stage that  
62 flags the first 4 groups of each integration as ‘do not use’. Though this decreases the effective  
63 integration time, the linearity and stability of the detector signals are improved in a substantial  
64 way, resulting in increased signal-to-noise ratios of the final extracted spectra. Note that also the  
65 last group of each integration is standard flagged as ‘do not use’, as this group is strongly affected  
66 by the detector reset (see also ref. <sup>47</sup>). The infrared background emission was removed by deter-  
67 mining a median background per detector row and integration using detector columns 12 to 19  
68 (starting from 0) and 52 to 59. We used the `CASCADE-filtering` package version 1.0.2 to  
69 identify any bad pixels or cosmic ray hits not identified in the Detector1 pipeline stage. We then  
70 used this package to clean all pixels flagged as ‘do not use’ before spectral extraction. We used the  
71 `CASCADE-jitter` package version 0.9.5 to determine the spectral trace to be able to precisely  
72 position the extraction aperture. The time averaged polynomial coefficients of the spectral trace  
73 are 35.29,  $4.313 \times 10^{-3}$ ,  $5.947 \times 10^{-6}$  and  $-9.484 \times 10^{-8}$  from zero to third order, respectively. We  
74 extracted the 1D spectral time series data from the spectral images using the `extract1d` pipeline  
75 step. In this step we used the polynomial coefficients from the trace fit listed above to centre a  
76 constant width extraction aperture of 8 pixels at the exact source position for all wavelengths. The  
77 spectral flux values are calculated by summing the signal on the detector within the region defined  
78 by the extraction aperture and wavelength bins. Suppl. Inf. Figure 1 shows the time series of the  
79 extracted LRS spectra. Also shown in that figure is the derived movement of the spectral trace in  
80 the cross dispersion direction and the full-width at half maximum (FWHM) of the spectral trace at  
81 the shortest wavelengths. Apart from the first half an hour, no substantial photometric or positional  
82 drifts can be observed, showing the exquisite stability of the MIRI instrument.

83 For the light curve fitting, we used the identical procedure as described in ref. <sup>11</sup> using the  
84 `CASCADE`-package version 1.2.2. We omitted the first 744 integrations (about 1.3 hours) to avoid  
85 the response drifts seen in Suppl. Inf. Figure 1. Before the spectral light curve fitting, we binned  
86 the spectra to a uniform wavelength grid with a  $0.15 \mu\text{m}$  bin width. For the systematics model (see  
87 ref. <sup>48</sup> for details), we used as additional regression parameters the time, the FWHM of the spectral  
88 trace, and the trace position as plotted in Suppl. Inf. Figure 1. The orbital parameters of WASP-  
89 107b were fixed to the values derived in the band-averaged light curve analysis from the `TEATRO`  
90 data reduction (see Suppl. Inf. Table 1). Limb-darkening coefficients for each spectral channel  
91 were calculated using the `EXOTETHYS`-package <sup>44</sup> (see Suppl. Inf. Table 1). The `CASCADE` band-  
92 averaged results from our spectral light curve analysis are presented in Suppl. Inf. Figure 2 and the  
93 `CASCADE` transmission spectroscopy results are provided in Extended Data Table 1 and shown in  
94 Figure 1. The error estimates on the transit depths were derived by performing a bootstrap analysis.



Suppl. Inf. – Figure 2: **CASCADe band average light curve analysis.** Panel (a): The band-averaged JWST MIRI/LRS light curve data of the transit of WASP-107b and the fitted systematics model. Panel (b): The systematics corrected band-averaged light curve with the fitted transit model. Panel (c): The band-averaged residuals after subtracting the best-fit light curve model. The shaded area indicates the orbital phases during which the transit occurs. Note that the first 744 integrations have been removed from the light curves shown in this figure.

## 95 1.2. Eureka! data reduction setup

96 Data reduction was conducted using the STScI `jwst` pipeline version 1.8.5 under CRDS context  
 97 1030. At the ramp and pixel scale, the first four frames corresponding to the ones affected by  
 98 the RSCD effect<sup>49</sup> were flagged and ramp non-linearity correction was performed using a custom  
 99 correction file ( Suppl. Inf. 1.4). Contrary to the *CASCADe* and *TEATRO* data reductions, no  
 100 custom dark file is needed as pipeline version 1.8.5 uses different correction which did not show  
 101 an excess scatter. Cosmic rays were flagged with a rejection threshold of  $5\sigma$  and the ramps were  
 102 fitted using a least-squared minimisation algorithm. To comply with the JWST MIRI spectroscopic  
 103 performances of time-series observations<sup>11</sup>, the electronic gain value was lowered from 5.5 to 3.1  
 104  $e^- \text{ DN}^{-1}$ . The background was subtracted following the same method as in ref. <sup>11</sup>. In particular,  
 105 7 columns on the left and 7 on the right sides of the trace (column 36) were selected, a median  
 106 value was taken and then subtracted from the spectral image. A spatial filter of outlier detection

107 was then applied to remove any hot pixel that would have been left in the subarray. An optimal  
108 spectral extraction with a half-width extraction aperture of 4 pixels was then performed using the  
109 Eureka! package<sup>12</sup>. We extracted 51 spectroscopic light curves between 4.61 and 11.83  $\mu\text{m}$  with  
110 a 0.15  $\mu\text{m}$  bin width, ran a sigma-clipping of 20 integrations with a rejection threshold of  $5\sigma$ , and  
111 trimmed the 250 first integrations to get rid of strong persistence effects. Light curves were then  
112 fitted using the MCMC `emcee` sampler<sup>50</sup>, the `batman` transit model<sup>51</sup> and both an exponential  
113 and a second order polynomial model for systematics. We used the band-averaged light curve fit to  
114 refine the mid-transit timing, the ratio of the semi-major axis over the stellar radius, and inclination  
115 parameters (see Suppl. Inf. Table 1). The ratio of the planet radius over the stellar radius, the limb-  
116 darkening coefficients and the systematics parameters were then used as free parameters for all  
117 spectroscopic channels (see Suppl. Inf. Table 1). The Eureka! transmission spectroscopy results  
118 are provided in Extended Data Table 1 and shown in Figure 1.

### 119 1.3. TEATRO data reduction setup

120 We processed the data using the Transiting Exoplanet Atmosphere Tool for Reduction of Observa-  
121 tions (TEATRO) that runs the `jwst` package, extracts and cleans the stellar spectra and light curves,  
122 and runs light curve fits. In the `jwst` `Detector1` pipeline, we use the same dark and linearity cor-  
123 rections as in `CASCADE` by overriding the default reference files. We subtracted the background  
124 per integration and per detector row and corrected for flagged pixels. We extracted the stellar spec-  
125 tra by summing the flux in a 12 pixel wide aperture, summed them between 4.61 – 11.83  $\mu\text{m}$   
126 to obtain the band-averaged light flux, and binned them in 51 wavelength bins from 4.61 to 11.83  $\mu\text{m}$   
127 (bin width of 0.15  $\mu\text{m}$ ) to obtain the spectroscopic light curves. We discarded the first 1.4 hr that  
128 show a decay caused by persistence effects, normalised the light curves by the out-of-transit flux,  
129 and removed outliers. We fitted the light curves by a transit light curve model computed with the  
130 `exoplanet` package<sup>52,53</sup> and a linear trend. We fitted that model to the data using a MCMC  
131 procedure based on the `PyMC3` package as implemented in `exoplanet`<sup>52,53</sup>. We refined the mid-  
132 transit time, planet-to-star radius ratio, and inclination from a band-averaged light curve fit (Suppl.  
133 Inf. Table 1), and let only the planet-to-star radius ratio and a linear trend as free parameters for  
134 the spectroscopic light curve fits. The limb-darkening coefficients for each spectral channel were  
135 fixed to the values used in the `CASCADE` reduction. We used the median of the posterior distribu-  
136 tions as final parameters, and computed the transit depth uncertainties by a quadratic sum of the  
137 standard deviations of the residuals of the in- and out-of-transit points divided by the square root  
138 of their respective number of points, because it gives more conservative uncertainties than those  
139 obtained from the MCMC posterior distributions. The TEATRO transmission spectroscopy results  
140 are provided in Extended Data Table 1 and shown in Figure 1.

### 141 1.4. Data non-linearity correction

142 The adopted readout pattern for all JWST instruments, including those of the MIRI instrument, is  
143 the so-called `MULTIACCUM` readout pattern. The MIRI pixels are read non-destructively (charges

144 are read but not reset) at a constant rate until a final read followed by two resets to clear the  
145 accumulated charges. An integration thus consists of a number of samples of the accumulating  
146 detector signal, resulting in a ramp, that, when fitted, yields a measure of the flux per pixel. For a  
147 detailed discussion of the MIRI focal plane arrays and read out patterns we refer to ref. <sup>37</sup>.

148 The MIRI detector ramps show several non-ideal behaviours, influencing the slope derivation  
149 and thus the flux estimates. We refer to ref. <sup>47</sup> for a review of all detector effects influencing the  
150 sampling of the detector ramps and their mitigation in the JWST data reduction pipeline. The two  
151 main non-linearity effects which are important for transit observations are the reset switch charge  
152 decay <sup>47</sup> and the debiasing effect in combination with a diffusion of electrons to neighbouring  
153 pixels <sup>47,54</sup>. While the former affects mainly the first few reads of the detector ramps, and can be  
154 mitigated by not using the affected reads when determining the slope of the detector ramps, the  
155 latter effects need to be corrected before the slope of the detector ramps can be correctly measured.  
156 For a detailed discussion on the detector voltage debiasing and related effects, see ref. <sup>54</sup>. In brief,  
157 a detector circuit as used in MIRI can be seen as a resistor-capacitor circuit. Charge accumulation  
158 at the integration capacitors reduces the net bias voltage, which in turn leads to a lower response  
159 of the detector as it causes the width of the depletion region to shrink below the active layer width,  
160 and a smaller fraction of the produced photoelectrons are guided to the pixels. The diffusion of  
161 photo-excited electrons in the undepleted region of a (near) saturated pixel to the depleted region  
162 at neighbouring pixels – dubbed the brighter-fatter effect <sup>54</sup> – can be observed in the WASP-107b  
163 data but only at a low level, as the maximum observed signal level of the detector ramps remains  
164 well below the saturation limit. The main effect of the electron diffusion in the WASP-107b data  
165 is an additional loss of electrons in the central pixels of the spectral point spread function (PSF),  
166 in combination with a small gain of electrons in the neighbouring pixels in the wing of the PSF.  
167 **As we will show in the following, parametric model can still be used for this data set to**  
168 **derive an effective debiasing of the detector pixels and properly linearize the detector ramps,**  
169 **mitigating the combined effects of detector debiasing plus electron diffusion.** We, therefore,  
170 ignored the electron diffusion effect in our analysis, and focused on correcting the main detector  
171 ramp non-linearity due to debiasing.

172 The standard correction for the non-linearity of the detector ramps due to the debiasing effect,  
173 implemented in the `linearity` step of the JWST data reduction pipeline, is derived by fitting a  
174 cubic polynomial to the detector ramps of dedicated calibration data, and using the linear term as  
175 an estimate of the linearised signal of the detector ramp. A functional relation is then determined  
176 between linearised signal and observed signal using a fourth-order polynomial. The polynomial  
177 coefficients from this fit are stored in the CRDS calibration file for the `linearity` pipeline step.  
178 Note that the standard linearity correction implements an identical correction for all detector pixels  
179 in the MIRI/LRS subarray. Also note that the standard correction was derived using data from an  
180 spatially extended illumination source, which results in data not influenced by electron diffusion  
181 as there is no significant electrical field differences between neighbouring pixels.

182 To test the default linearity correction (pmap version 1030), we checked the behaviour of  
183 the detector ramps by creating pair-wise differences of the readouts (frames or groups in case of



184 MIRI). In case of a perfect linear ramp, the pair-wise differences of a detector ramp for a single  
 185 detector pixel should have a constant value. Panels a, d, g, j and m (the left column) of Suppl. Inf.  
 186 Figure 3 displays the pair-wise differences of the uncalibrated data (`uncal` data product), clearly  
 187 showing non-constant values for those pixels receiving the highest photon flux. Note that the slope  
 188 change of the first few differences is dominated by the RSCD, and the last pair by the last-frame  
 189 effect. Applying the default linearity correction substantially improves the linearity of the ramps  
 190 but a slope can still be seen when plotting the pair-wise differences in panels b, e, h, k and n (the  
 191 second column ) of Suppl. Inf. Figure 3, indicating that the default correction is not yet optimal.  
 192 As non-linearity effects can have a substantial impact on the derived transit depth, we derived an  
 193 alternative linearity correction based on the data itself. We fitted the following **parametric model**  
 194 to the detector ramps

$$S_{ij}(t) = a_{ij,0} + \tau_{ik,1} \cdot a_{ij,1} \cdot \left(1 - e^{\frac{-t}{\tau_{ij,1}}}\right) - \tau_{ij,2} \cdot a_{ij,2} \cdot e^{\frac{-t}{\tau_{ij,2}}}$$

$$i \in \{0, \dots, 415\}, \quad j \in \{0, \dots, 72\}, \quad 0 \leq t \leq T_{\text{int}}$$

195 In this equation,  $t$  is the time between 0 and the duration of a single integration  $T_{\text{int}}$ . The  
 196 first term represents the debiasing effect, with  $a_{ij,0}$  the reset level for a single pixel with detector  
 197 row index  $i$  and column index  $j$ ,  $a_{ij,1}$  and  $\tau_{ik,1}$  the linearised slope of the detector ramp and **the**  
 198 **time constant combined effects of the detector debiasing plus electron diffusion**, respectively.  
 199 The second term models the RSCD effects with  $a_{ij,2}$  and  $\tau_{ij,2}$  the amplitude and time constant  
 200 for the estimate of the RSCD effect. Though we will not use the fitted contribution of the RSCD  
 201 effect in this study, we included the term in the fit to ensure we obtained an unbiased estimate of  
 202 the **combined debiasing and electron diffusion effects**. Using this model, we fitted the detector  
 203 ramps after applying the `reset` pipeline step, for all integrations after the transit. Using the  
 204 fitted estimate of the linearised signal, we followed the procedure described in ref. <sup>47</sup> to derive a  
 205 custom non-linearity correction used in the `linearity` pipeline step. Panels c, f, i, l and o (the  
 206 right column) of Suppl. Inf. Figure 3 show the slope estimates of the linearised ramps using our  
 207 custom non-linearity procedure. One can see that our custom linearisation improves the linearity  
 208 of the detector pixels in the detector column at the centre of the spectral trace. To check the  
 209 linearisation in the of the detector signals in the direction across the spectral trace, we show in  
 210 Suppl. Inf. Figure 4 our results for several detector columns across the spectral PSF for detector  
 211 row 385, which corresponds to the shortest wavelengths in our spectra. Comparing our results  
 212 shown in this latter figure to the linearised ramps using the standard calibration, one can observe  
 213 again a substantial improvement in the linearity of the ramps. Note that for detector pixels with  
 214 a row number below 305 (equivalent to wavelengths beyond approximately  $8 \mu\text{m}$ ), which see a  
 215 sufficiently low signal, no differences can be observed between our calibration and the standard  
 216 CRDS linearisation. This is expected, as the detector ramps for those pixels are expected to be  
 217 (near) linear.

218 Another test to check the non-linearity correction of the detector ramps is to look at the  
 219 FWHM of the spectral trace. As the central detector pixels in the spectral trace see a stronger signal,



Suppl. Inf. – Figure 3: **Linearity of the detector ramps for selected detector pixels along the spectral trace.** Shown are the pair-wise differences of the samples of the detector ramps for a number of detector pixels. From left to right are shown the ramp gradients for the `uncal` data product, the standard `reset`, `dark` and `linearise` processed data using the calibration files from CRDS with `pmap` version 1030, and the data product using a custom calibration for the `linearise` and `dark` calibration steps. From top to bottom are shown the data for 5 detector pixels corresponding to the maximum signal in the spectral trace of WASP-107 at different wavelengths. The pixel indices are indicated in the legends shown in the left column. The shaded regions indicate the data not used in the final determination of the slopes of the detector ramps. The dashed lines are plotted to guide the eye and represent the average linear slope after applying our custom calibration.



Suppl. Inf. – Figure 4: **Linearity of the detector ramps for selected pixels across the spectral trace.** The data shown in this figure is similar to Suppl. Inf. Figure 3 but now for 6 detector pixels corresponding to a cross-section (from top to bottom, detector columns 34 to 39) of the spectral trace of the dispersed light at detector row 385, the latter corresponding to the shortest wavelength in our spectra. Note that panels g,h,and i correspond to panels a,b, and c of Suppl. Inf. Figure 3.

220 they will be subject to a stronger non-linearity, leading to a broadening of the point spread function  
 221 of the individual readouts of the detector ramps during an integration<sup>54</sup>. Suppl. Inf. Figure 5 shows  
 222 our estimates of the FWHM of the spectral trace for frame difference pairs along the detector

223 ramp. Panels (a) and (c) show the average FWHM of the spectral trace for frame difference pairs 5  
224 to 10, which are the first samples not substantially influenced by the RSCD effects, and the frame  
225 difference pairs 34 to 38, respectively. The data calibrated using the standard calibration (panel (a))  
226 clearly shows a broadening of the point spread function (PSF) during an integration. The custom  
227 calibrated data, however, shows no such effect (lower left panels). Panels (b) and (d) of Suppl.  
228 Inf. Figure 5 show the average FWHM as a function of frame difference pair for the detector rows  
229 382 to 386, which sample the shortest wavelengths and receive the highest photon flux from the  
230 target. Again, the detector data calibrated with the standard calibration shows a broadening of the  
231 PSF during the sampling up the ramp (panel (b)) while no such effect can be observed for the data  
232 calibrated with our custom calibration (panel (d)). The shaded grey regions in the right panels  
233 indicate the data not used in the final determination of the slopes of the detector ramps, as those  
234 points are strongly affected by the RSCD and last-frame effects.

235 Finally, Suppl. Inf. Figure 6 shows the FWHM of the brightest pixels as a function of time.  
236 As evident in that figure, the data calibrated using the standard CRDS calibration shows a drop of  
237 the derived FWHM during the transit. The drop in the observed signal during the transit of about  
238 2% is clearly enough to have a measurable effect on the photometric signal in case the non-linearity  
239 of the detector ramps is not properly corrected. Applying our custom calibration for this dataset,  
240 no significant effect of the transit on the FWHM estimate can be observed.

## 241 1.5. Comparison between the three JWST MIRI data reduction setups

242 To assess the quality of our data reductions and to identify possible biases between the 3 applied  
243 data reduction packages, we compared the uncertainty estimates and the differences in the derived  
244 transit depths.

245 We found that with a single-transit observation we reached a spectrophotometric precision  
246 of  $\sim 80$  ppm in the  $7-8 \mu\text{m}$  range at a spectral resolution  $R=50$  (see Suppl. Inf. Figure 7). We  
247 used the JWST Exposure Time Calculator (ETC)<sup>55</sup> to estimate the signal-to-noise ratio on a single  
248 integration. Using this estimate, we simulated the light curves per spectral channel assuming  
249 a constant transit depth equal to the observed band-averaged transit depth. The simulated light  
250 curves were then fitted using the `CASCADE` package to estimate the error of the simulated transit  
251 spectrum. This estimate is shown as the solid curve in Extended Data Figure 7. All three data  
252 reductions are consistent with this estimate, indicating that our results are close to the photon  
253 noise limit of the instrument. Note that the noise limit estimate based on the ETC still contains  
254 uncertainties about the exact value of the detector gain and thus photon conversion efficiency and  
255 the level and modelling of the infrared background at longer wavelengths. The largest differences  
256 between the error estimates are observed at wavelengths beyond  $10 \mu\text{m}$ , which is expected as the  
257 signal to noise of the data rapidly drops beyond this wavelength.

258 Our derived band-averaged transit depths are  $20,463 \pm 39$  ppm (see also Figure 1),  $20,552$   
259  $\pm 17$  ppm, and  $20,566 \pm 33$  ppm, for `CASCADE`, `Eureka!`, and `TEATRO`, respectively. These  
260 values are within  $1\sigma$  of the previously measured transit depth at near-infrared wavelengths with



Suppl. Inf. – Figure 5: **FWHM estimates of the spectral trace for different detector ramp frames.** Panels (a) and (b) show the results for the standard calibrated detector ramps while panels (c) and (d) show the results from our custom calibrated data. Panels (a) and (c) show the average FWHM of the spectral trace for detector rows 280 to 390, for frame difference pairs 5 to 10, and 34 to 38, respectively. Panels (b) and (d) show the average FWHM as a function of frame difference pair number for detector rows with the highest signal. The shaded regions in the right panels indicate the data not used in the final determination of the slopes of the detector ramps.

261 the HST (see Sect. 2.3), and well within  $3\sigma$  from each other, showing that all 3 methods give a  
 262 consistent estimate of the overall transit depth.

For the comparison of the 3 derived transit spectra, we calculated the difference between pairs of data using a different reduction method as

$$\frac{\text{TD}_1(\lambda) - \text{TD}_2(\lambda)}{\sqrt{\text{err}_1^2(\lambda) + \text{err}_2^2(\lambda)}}, \quad (1)$$

263 with  $\text{TD}_1$  and  $\text{TD}_2$  being the transit depth of reduction method 1, or 2, respectively, at wavelength  
 264  $\lambda$  and  $\text{err}_1$  and  $\text{err}_2$  being the corresponding  $1\sigma$  errors shown in Suppl. Inf. Figure 7. As can be  
 265 seen in Suppl. Inf. Figure 8, the three data reduction methods are within  $3\sigma$  agreement, 96% of



Suppl. Inf. – Figure 6: **Mean FWHM of the spectral trace for the detector rows 380 to 390.** The blue squares show the FWHM as a function of time after applying the standard calibration from CRDS, while the black dots show the measured FWHM after using our custom non-linearity correction. To show the non-linearity effects more clearly, each data point represents an average of 22 integrations. The dashed line is plotted to guide the eye and represents zero variations. The shaded area indicates the time window where the transit occurs.



Suppl. Inf. – Figure 7:  **$1\sigma$  uncertainties on the transit depths as a function of wavelength for the three data reductions.** The blue dots, orange diamonds and black squares show, respectively, the error estimates using the CASCADE, the Eureka!, and the TEATRO codes. The solid line shows the photon, dark and read noise limited performance estimate based on ETC calculations for comparison. This plot displays the performance of the MIRI/LRS instrument and the reliability of the three data reduction methods.

266 the points being in  $2\sigma$  agreement. For wavelengths shorter than  $10\ \mu\text{m}$ , no significant systematic  
267 deviations between the data reductions can be observed. For the longer wavelengths, a small  
268 positive offset can be seen in Suppl. Inf. Figure 8 for the three reductions that remains, however,  
269 within  $1\sigma$  difference.

270 The observed systematic trend in transit depth differences for the longer wavelengths can be  
271 attributed to the different systematics models employed by the `CASCADE`, `TEATRO` and `Eureka!`  
272 reduction codes. `TEATRO` cuts the initial ramp caused by persistence effects at the beginning of  
273 the observation and fits only a linear trend, `Eureka!` includes both an exponential model at the  
274 beginning of the observation and a polynomial one that fits any bending of the light curve, and  
275 in the `CASCADE` analysis, the initial response drift caused by persistence effects is also removed  
276 and the fitted systematics model is constructed from the data itself (see ref. <sup>56</sup>) using the causal  
277 connection between the different wavelength channels in addition to the time, trace position and  
278 FWHM. Small differences in the curvature of the baseline will then translate in small differences of  
279 the fitted transit depth. **In general, however, these results demonstrate that all three reduction**  
280 **methods are compliant with each other.**

## 281 2. Ancillary data

### 282 2.1. NUV data

283 Contemporaneously with the JWST observations, from 2023 January 5 to 29, *Swift* conducted a  
284 ‘Target of Opportunity’ (ToO) observing campaign (Target Id. 15428) for WASP-107, with the  
285 UVOT<sup>57</sup> as the primary instrument, and utilising the `uvm2` filter to optimise the waveband defi-  
286 nition and avoid redward ‘leaks’ present in `uvw2`<sup>58</sup>. The `uvm2` filter has a central wavelength of  
287  $2246\ \text{\AA}$  and a FWHM of  $498\ \text{\AA}$ <sup>59</sup>. The observing campaign consisted of 13 *observation segments*  
288 comprising a total of 20 *snapshots* (i.e. continuous exposure periods). Each segment was typically  
289  $\sim 1.5\text{--}2$  ks in duration; with snapshots ranging from the full segment length down to  $\sim 500$  s. All  
290 observations were performed in *full imaging* mode, i.e. the snapshot duration was the maximum  
291 available time resolution.

292 Data from *Swift* observations are automatically processed by the *Swift*-project pipeline, and  
293 placed in an online publicly-accessible archive. The required data products, all FITS-format files,  
294 were downloaded from the archive, on 2023 February 22. These UVOT data products were, for  
295 each of the 13 observation segments, the segment image file summed over the snapshots in the  
296 segment (1 or 2 in the present case), the snapshot image file containing the individual snapshot  
297 images and the detected sources catalogue table. The photometry presented in the images is in units  
298 of recorded counts/pixel, where  $1\ \text{pixel} = 1 \times 1\ \text{arcsec}^2$ . The ancillary data and visual inspection  
299 of the snapshot-level images, indicated that one snapshot (segment-9, snapshot-1) had an aspect-  
300 solution problem. These data were excluded from the associated segment image and from further  
301 consideration in our analysis, and had been excluded from the automatic pipeline processing. All  
302 the following results reported here were based on the segment-level images, i.e. we have available



Suppl. Inf. – Figure 8: **Transit depth differences between the three data reduction methods as a function of wavelength.** In panel (a), the blue dots show the differences in units of  $\sigma$  between the CASCADe and Eureka! reductions, the orange triangles the differences between the CASCADe and TEATRO reductions, and the black squares the differences between the Eureka! and TEATRO reductions as computed from Eq. 1. The histograms in panel (b) show the number of points in agreement within the different  $\sigma$  ranges, with colours identical to those in panel (a).

303 13 photometry values. We verified that, for the seven segments containing two snapshots, the  
 304 photometry values were consistent within the statistical errors.

305 The information in the pipeline-generated source catalogue included, for each detected source,  
 306 sky-coordinates and photometric values, the latter at successive levels of correction, from ‘raw’  
 307 counts through to PSF-corrected isophotal flux densities. The pipeline source detection employs  
 308 the *Swift* tool `uvotdetect`, which in turn invokes the SourceExtractor (SE) package<sup>60</sup> to per-  
 309 form source detection and characterisation, including isophotal signal extraction. For WASP-107,  
 310 we identified, with no ambiguity, the relevant row of the source table based on an estimated  
 311 epoch=J2023 position using coordinates and proper motions from CDS-SIMBAD. The UV co-  
 312 ordinates for all segments lay within 1 arcsec of the estimated optical stellar location and within  
 313 0.5 arcsec of the mean UV position. The data were analysed interactively using the *Swift* software



314 tools in `HEASOFT` 6.31.1 and the latest available calibration files (CALDB dated 2021-11-08), with  
 315 `ds9` to display the images, and `TOPCAT/STILTS`<sup>61</sup> to manipulate and view the source-catalogue  
 316 tables. As recommended by the *Swift* project, we used the `uvotmaghist` tool, with a source-data  
 317 extraction radius of 5 arcsec centred on the mean UV position, to perform aperture photometry for  
 318 WASP-107 on the 13 segment images. We used an annular background region with the same cen-  
 319 tre, and inner and outer radii of 20 and 40 arcsec, respectively. We determined by inspection of  
 320 the UVOT source detections and visually on the images, that the selected background region was  
 321 free of contamination from nearby sources, and the inner radius was sufficiently removed from the  
 322 target source to avoid significant contamination.

323 All 13 aperture-photometry values are consistent within the statistical errors (which dominate  
 324 the overall errors, as reported by `uvotmaghist`), with a reduced chi-square  $\chi^2/\text{dof} \sim 1$  about  
 325 the mean (with the degrees of freedom, dof, being 12); and at  $\sim 10\%$ , the sample standard devia-  
 326 tion was comparable with the  $1\sigma$  error on the individual data values. The source count rate from  
 327 individual segments was  $\sim 0.1 \pm 0.01$  ct/s. The mean flux density received at Earth distance was  
 328  $1.08 \pm 0.03$  erg cm<sup>-2</sup> s<sup>-1</sup> Å<sup>-1</sup>, corresponding to a luminosity of 5.4 erg s<sup>-1</sup> Å<sup>-1</sup> and a flux density  
 329 incident on WASP-107b of 6.4 erg cm<sup>-2</sup> s<sup>-1</sup> Å<sup>-1</sup>. We found good agreement between the flux  
 330 values from `uvotmaghist` aperture photometry and `uvotdetect/SE` isophotal extraction. In  
 331 making the conversion from instrumental count rate to calibrated flux values, `uvotmaghist` and  
 332 `uvotdetect` assume a gamma-ray-burst-type spectrum, given the prime objective of the mission.  
 333 However, the difference for a cool-star spectrum is expected to be no more than  $\sim 15\%$ <sup>62</sup>. Given  
 334 the proximity of WASP-107 to Earth ( $\sim 65$  pc) and relatively high galactic latitude ( $\sim 52$  deg), we  
 335 have not attempted to make any allowance for extinction along the line-of-sight. We note that the  
 336 NUV irradiance of WASP-107b by its host star is (by chance) comparable (within a factor  $\sim 2$ )  
 337 with that of the Earth by the Sun<sup>63</sup>, the larger separation of the latter pair being offset by the Sun's  
 338 hotter and larger-area photosphere (spectral type G2 V versus K6 V).

## 339 2.2. X-ray data

340 XMM-Newton has observed the host star WASP-107 on 2018-06-22 (ObsID 0830190901) with the  
 341 EPIC X-ray telescope (pn, MOS1, MOS2 instruments; all utilising the `THIN` filter)<sup>64,65</sup> yielding  
 342 an exposure time of  $\sim 60$  ks in a single, continuous observation. The host star was detected in X-  
 343 rays<sup>66-69</sup>, with an X-ray flux in the order of  $1 \times 10^{-14}$  erg cm<sup>-2</sup> s<sup>-1</sup> in the soft X-rays, equivalent  
 344 to a luminosity of  $\sim (4 - 7) \times 10^{27}$  erg s<sup>-1</sup> (depending on the adopted spectral energy range) for a  
 345 distance of 64.7 pc, yielding an X-ray flux incident on WASP-107b of  $\sim 5 \times 10^2$  erg cm<sup>-2</sup> s<sup>-1</sup> [68].

346 The flux and luminosity values in the cited literature have a wide range with differences of  
 347 up to  $\sim 40\%$ . Therefore, we have performed our own analysis of the XMM-Newton X-ray data,  
 348 using the `SAS` data-analysis package, to extract source (and background) counts as a function of  
 349 photon energy. We binned the spectra to bins with at least 25 source counts each to allow for  
 350 proper application of  $\chi^2$  fit statistics. The source count-rate was  $\sim 0.01$  ct/s, and the time-series  
 351 showed no evidence for variability. The `XSPEC` package<sup>33</sup> was used for fitting optically-thin  
 352 thermal models in collisional equilibrium (coronal models) to the extracted spectra, having two

353 temperature components representing a wider, presumably continuous distribution of plasma, and  
 354 a photoelectric absorption component to account for interstellar absorption. The data from all  
 355 three EPIC instruments were fitted simultaneously after removing the notoriously difficult lowest-  
 356 energy spectral bins below 0.2 keV. Following ref.<sup>69</sup>, we adopted a fixed, interstellar photoelectric  
 357 absorption component equivalent to a hydrogen column density of  $N_{\text{H}} = 2 \times 10^{19} \text{ cm}^{-2}$  given the  
 358 distance to WASP-107.

359 Owing to the relatively modest signal-to-noise ratio (SNR) of the spectrum, the fits converged  
 360 to two classes of solutions in very different temperature regimes. We discriminated between them  
 361 by requiring that the solution fulfils the general scaling law between average X-ray stellar surface  
 362 flux and the logarithmically averaged coronal temperature, using the emission measures (EM =  
 363  $\int n_e n_i dV$ , where  $n_e$  and  $n_i$  are the coronal electron and ion number densities, respectively, and  $V$   
 364 is the coronal volume occupied by the plasma) of the components as weights<sup>71</sup>.

365 The coronal abundances are important quantities for such a fit but the limited SNR does not  
 366 allow individual element abundances to be retrieved. We therefore used one common abundance  
 367 factor  $Z$  for all elements with respect to their solar photospheric values (relative to H). We then  
 368 stepped through a grid of fixed  $Z$  values, fitting the spectrum for each  $Z$ , and then searching for  
 369 a solution that fulfils the coronal flux-temperature scaling relation while providing low  $\chi^2$  value.  
 370 Such a solution exists, with a reduced  $\chi^2$  value of 0.94 for  $Z = 0.22$ . The formal best-fit yielded  
 371 temperatures of  $T_1 = 1.69 \text{ MK}$  (million K) and  $T_2 = 8.6 \text{ MK}$ , with an emission-measure ratio  
 372  $\text{EM}_2/\text{EM}_1 = 0.54$ . The EM-weighted logarithmic average of the coronal temperatures as defined  
 373 in ref.<sup>71</sup> ( $\log \bar{T} = \sum_i \text{EM}_i \log T_i / \sum_i \text{EM}_i$ ) is  $\bar{T} = 2.96 \text{ MK}$ , a relatively modest temperature as  
 374 expected for a low-activity star. The corresponding absorption-corrected X-ray flux at Earth in  
 375 the spectral range of 0.1–10 keV is  $1.76 \times 10^{-14} \text{ erg cm}^{-2} \text{ s}^{-1}$ , equivalent to a luminosity of  
 376  $L_{\text{X}} \approx 8.8 \times 10^{27} \text{ erg s}^{-1}$  for a distance of 64.7 pc, yielding an X-ray flux incident on WASP-107b  
 377 of  $\sim 9.7 \times 10^2 \text{ erg cm}^{-2} \text{ s}^{-1}$ .

378 A rotation period of  $17.5 \pm 1.5 \text{ d}$  was derived from *Kepler* K2 photometry<sup>72</sup>, while the  
 379 WASP-107 photometry yields an estimate of  $17 \pm 1 \text{ d}$ <sup>1</sup>. From gyrochronology modelling and the  
 380 rotation period derived from the WASP photometry, an age estimate of  $3.4 \pm 0.3 \text{ Gyr}$  has been  
 381 derived<sup>2</sup>. From recent studies of the activity-age-rotation relation for cool main-sequence stars<sup>73</sup>  
 382 we would expect an X-ray luminosity in the order of  $10^{28} \text{ erg s}^{-1}$  for a star with a mass of  $0.68 M_{\odot}$   
 383 and an age of a few Gyr. This matches our derived X-ray luminosity very well.

### 384 2.3. HST data

385 A transit of WASP-107b was observed on June 5–6, 2017 with the Wide Field Camera 3 (WFC3)  
 386 instrument onboard the *Hubble Space Telescope* (HST) using the  $1.41 \mu\text{m}$  Grism (G141). The  
 387 data were obtained as part of the general observer program 14915 (P.I. L. Kreidberg). We refer to  
 388 ref.<sup>4</sup> for details on the observations and the initial data analysis. We performed an independent  
 389 calibration and light curve fitting of the HST data using the CASCADe package. For details on the  
 390 use of CASCADe on HST data, see ref.<sup>48</sup>. We ran CASCADe using the same orbital and stellar

391 parameters as used for the analysis of the JWST MIRI light curve data (see Methods), except for  
392 the ephemeris, for which we used the value published in ref. <sup>42</sup>. This latter value gives a mid-transit  
393 time within 28 s of the value derived by ref. <sup>4</sup>. We choose to use the value of ref. <sup>42</sup> as it resulted in  
394 slightly lower residuals after subtracting the best fit light curve model.

395 Before fitting the spectral light curve data, we binned the original spectral resolution of the  
396 HST/WFC3 data to a uniform wavelength grid with a spectral bin width of  $0.00757\mu\text{m}$ . Of the first  
397 HST orbit, the first 6 spatial scans were not used in our analysis as they showed a very strong initial  
398 drift. For the systematics model (see ref. <sup>48</sup> for details), the additional regression parameters were  
399 the time variable and the trace position. The derived transit spectrum is plotted in the top panel of  
400 Figure 9 (blue squares). We derived a band-averaged transit depth of  $20,448\pm 79$  ppm, consistent  
401 within  $1\sigma$  of the transit depth derived from the JWST MIRI observations. The errors in the transit  
402 spectrum and band-averaged depth were estimated by performing a bootstrap analysis. For the  
403 retrieval analysis, we binned the spectrum to a slightly lower spectral resolution, with a spectral  
404 bin width of about  $0.02\mu\text{m}$  to increase the signal-to-noise ratio per spectral channel and to ensure  
405 that each spectral bin is independent. A comparison of the spectrum derived using the `CASCADE`  
406 package to the previous published spectrum of ref. <sup>4</sup> can be seen in the lower panel of Suppl. Inf.  
407 Figure 9. Both spectra are in excellent agreement with each other. The band-averaged transit  
408 depth of ref. <sup>4</sup> is 145 ppm, less than  $2\sigma$ , larger than the averaged depth we derived. This difference  
409 is consistent with the quoted error bars and can easily be explained by the large systematics and  
410 sparse time sampling of the data, in combination with the different methods used to fit the baselines  
411 of the spectral light curves.

### 412 3. Retrieval analysis

413 To constrain the atmospheric properties of WASP-107b we carried out retrievals with two different  
414 codes: `ARciS` <sup>13</sup> (see Sect. 3.1) and `petitRADTRANS` <sup>14</sup> (see Sect. 3.2).

#### 415 3.1. `ARciS` retrieval setup

416 The atmospheric modelling and retrieval code `ARciS` <sup>13</sup> was used to perform retrievals using a free  
417 parameterised retrieval setup. Our nominal model for `ARciS` consists of a pressure-temperature  
418 profile with a constant value of  $d\log T/d\log P$ . The temperature at a pressure level of 1 bar is  
419 retrieved. Since this is too deep in the atmosphere to be observable, we report the temperature  
420 and uncertainties derived from this profile at  $P = 10^{-5}$  bar, which is the pressure level dominating  
421 the observed transit spectrum. It is important to realise that the derived temperature gradient is  
422 only representative of the uppermost atmosphere that we probe with the observed transit spectrum.  
423 We include as absorbing molecular species  $\text{H}_2\text{O}$  <sup>77</sup>,  $\text{CO}$  <sup>78</sup>,  $\text{CO}_2$  <sup>79</sup>,  $\text{CH}_4$  <sup>80</sup>,  $\text{C}_2\text{H}_2$  <sup>81</sup>,  $\text{SO}_2$  <sup>82</sup>,  $\text{SO}$  <sup>83</sup>,  
424  $\text{H}_2\text{S}$  <sup>84</sup>,  $\text{SiO}$  <sup>85</sup>,  $\text{HCN}$  <sup>86</sup>,  $\text{NH}_3$  <sup>87</sup>, and  $\text{PH}_3$  <sup>88</sup>. The temperature and pressure dependent opacities were  
425 computed from the line lists and formatted for `ARciS` input <sup>89</sup>. For each species, a log-uniform  
426 prior for the volume mixing ratio from  $10^{-12}$  to 1 was taken. The remaining atmosphere consists



Suppl. Inf. – Figure 9: **HST/WFC3 transmission spectrum of WASP-107b**. Panel (a) shows the transmission spectrum derived using the `CASCADE` package (blue squares) together with a slightly lower resolution version of the same spectrum used in the retrieval analysis (black dots). Panel (b) shows the comparison between the spectrum derived by ref. <sup>4</sup> (green dots) and the `CASCADE` spectrum (blue squares), binned to the published wavelength resolution of ref. <sup>4</sup>. In both panels, the band-averaged transit depth is indicated by the dashed vertical line. The shaded area represents the 95 % confidence interval of the mean transit depth. The right y-axis gives the planetary spectrum in units of atmospheric scale height of the planetary atmosphere assuming it to be hydrogen dominated. In panel (b), the ref. <sup>4</sup> spectrum was shifted downwards by 145 ppm to the same mean transit depth as found in the `CASCADE` analysis for better comparison between the two spectra.

427 of  $\text{H}_2$  and He with a number density ratio of 0.85:0.15.

The cloud is modelled as a Gaussian layer with a certain width and optical depth at  $9 \mu\text{m}$ . The specific cloud density as a function of pressure  $P$  is given by

$$f_{\text{cloud}} = \frac{g \tau_{\text{cloud}}}{\kappa_{\text{cloud}} P \sigma_P \sqrt{2\pi}} \exp\left(-\frac{1}{2\sigma_P^2} \left[\log \frac{P}{P_0}\right]^2\right), \quad (2)$$

428 where  $g$  is the gravitational acceleration of the planet,  $\kappa_{\text{cloud}}$  is the cloud opacity at  $9 \mu\text{m}$ . The  
 429 parameters  $\tau_{\text{cloud}}$  (the cloud optical depth),  $P_0$  (the cloud pressure), and  $\sigma_P$  (the cloud width)  
 430 are retrieval parameters. Finally, we consider partial cloud coverage using a retrieval parameter  
 431  $f_{\text{coverage}}$  between zero and one.

432 For the composition of the cloud particles we take a mixture of amorphous  $\text{MgSiO}_3$  <sup>90</sup>,  
 433  $\text{SiO}_2$  <sup>91–93</sup>,  $\text{SiO}$  <sup>94</sup> and amorphous carbon <sup>95</sup>. We mix the refractive indices of these materials using

434 effective medium theory. We use the standard multi-component Bruggeman mixing rule. This  
 435 mixing rule has the benefit that all materials are treated the same and there is no dominant matrix  
 436 material defined (as is the case in the simpler Maxwell-Garnett mixing rule). Note that amorphous  
 437 carbon provides a continuum opacity and can be considered a placeholder for any cloud compo-  
 438 nent with a featureless spectrum (like, for example, metallic iron). The size of the particles,  $a_{\text{cloud}}$ ,  
 439 is assumed constant throughout the cloud and the optical properties are computed using irregu-  
 440 larly shaped particles simulated by the DHS (Distribution of Hollow Spheres) method<sup>96</sup> where the  
 441 irregularity parameter  $f_{\text{max}}$ , which describes how far the particle shape deviates from a homoge-  
 442 neous sphere, is another free parameter. The prior for  $a_{\text{cloud}}$  is taken to be log-uniform from 0.01  
 443 to 10  $\mu\text{m}$ . For  $f_{\text{max}}$  we take a linear prior from 0 to 1.

444 The above setup has 24 free parameters (1 for the radius, 2 for the  $T$ - $P$  structure, 12 molecules,  
 445 and 9 for the cloud structure and particle size/shape). We add one additional parameter allowing  
 446 for scaling of the HST data with respect to the JWST observations with a 0.38% Gaussian prior  
 447 corresponding to the uncertainty on the band-averaged transit depth. All parameters and corre-  
 448 sponding prior ranges are given in Suppl. Inf. Table 2. In the ARCIS retrievals we include the full  
 449 HST and the MIRI spectrum. In addition to this base model we also perform retrievals where one  
 450 of the molecular components is removed to test its significance. We convert the natural logarithm  
 451 of the Bayes factors into a rejection significance using the formalism presented in ref.<sup>97</sup>. To test the  
 452 significance of the clouds we perform retrievals using no clouds and one where the cloud opacity  
 453 is replaced with a parameterised opacity. A full corner plot showing the posterior distribution for  
 454 all retrieval parameters is shown in Suppl. Inf. Figure 10.

### 455 3.2. petitRADTRANS retrieval setup

456 Our nominal petitRADTRANS (pRT) forward model assumed an isothermal planetary atmo-  
 457 sphere with a uniform prior on temperature from 200 to 2,000 K. The following line absorber  
 458 species were included: H<sub>2</sub>O and CO<sup>78</sup>, C<sub>2</sub>H<sub>2</sub><sup>81</sup>, CO<sub>2</sub><sup>79</sup>, CH<sub>4</sub><sup>80</sup>, SO<sub>2</sub><sup>82</sup>, H<sub>2</sub>S<sup>84</sup>, SiO<sup>85</sup>, HCN<sup>86</sup>,  
 459 NH<sub>3</sub><sup>87</sup> and PH<sub>3</sub><sup>88</sup>. The opacities of all but the first two species were calculated in the pRT format  
 460 by ref.<sup>89</sup>. The mass fractions of all molecules were retrieved freely, with a log-uniform prior from  
 461  $10^{-10}$  to 1. The remaining atmospheric gas was assumed to be in the form of H<sub>2</sub> and He, at a  
 462 mass ratio of 0.72:0.28. The retrieved molecular mass fractions were converted to volume mixing  
 463 ratios for comparison with the ARCIS results. As gas continuum opacities we considered H<sub>2</sub>-H<sub>2</sub>  
 464 and H<sub>2</sub>-He collision induced absorption in addition to H<sub>2</sub> and He Rayleigh scattering<sup>98-105</sup>. The  
 465 planetary gravity was retrieved using tight priors from band-averaged light curve measurements  
 466 on the planet radius and from radial velocity (RV) measurements on the mass<sup>1</sup>. The planet ra-  
 467 dius at the reference pressure (taken to be 0.01 bar) was retrieved as a separate free parameter,  
 468 using a uniform prior from 0.7 to 2  $R_{\text{J}}$ . For our ‘complex’ cloud model we included amorphous  
 469 MgSiO<sub>3</sub><sup>106</sup>, SiO<sub>2</sub><sup>91-93</sup> and crystalline KCl<sup>92</sup> clouds, considering them to be irregularly shaped  
 470 (DHS method<sup>96</sup>). The cloud mass fractions at the base of the cloud had log-uniform priors from  
 471  $10^{-10}$  to 1, and the cloud base pressures  $P_{\text{base}}$  were retrieved with a log-uniform prior from  $10^{-6}$   
 472 to 1,000 bar. Above the cloud deck (at lower pressures) the cloud mass fraction was defined as



473  $X_{\text{base}} (P/P_{\text{base}})^{f_{\text{sed}}}$ , where  $X_{\text{base}}$  is the mass fraction at the cloud base and  $f_{\text{sed}}$  is the settling pa-  
 474 rameter, defined as the cloud particles' mass-averaged ratio of settling and mixing velocities. The  
 475 prior on  $f_{\text{sed}}$  was uniform, ranging from 0 to 10. The cloud particle sizes were then found as de-  
 476 scribed in ref. <sup>107</sup>, namely by assuming a log-normal size distribution, and making use of  $f_{\text{sed}}$ ,  $K_{\text{zz}}$ ,  
 477 and  $\sigma_g$ , where  $K_{\text{zz}}$  is the vertical eddy diffusion coefficient and  $\sigma_g$  is the width of the log-normal  
 478 particle size distribution. We assumed a log-uniform prior from  $10^5$  to  $10^{13}$   $\text{cm}^2 \text{s}^{-1}$  for  $K_{\text{zz}}$  and  
 479 a log-uniform prior on  $x_\sigma$  from  $10^{-2}$  to 1, where  $\sigma_g = 1 + 2x_\sigma$ . For our 'simple' cloud model  
 480 we replaced the cloud extinction opacity by  $\kappa(\lambda, P) = \kappa_{\text{base}} [1 + (\lambda/\lambda_0)^{-p}] (P/P_{\text{base}})^{f_{\text{sed}}}$ , where  
 481  $f_{\text{sed}}$  and  $P_{\text{base}}$  have the same meaning and priors as before. The opacity at the cloud base was  
 482 retrieved with a log-uniform prior from  $10^{-20}$  to  $10^{20}$   $\text{cm}^2 \text{g}^{-1}$ ,  $\lambda_0$  with a log-uniform prior from  
 483 0.01 to 100  $\mu\text{m}$ , and  $P$  with a uniform prior from 0 to 6. For both forward models we allowed for  
 484 a multiplicative flux scaling by 0.38% and 0.185% (Gaussian standard deviation of prior), for the  
 485 HST and JWST data, respectively, corresponding to the uncertainties on the band-averaged transit  
 486 depths. In the `petitRADTRANS` retrievals we include the full HST spectrum and the MIRI spec-  
 487 trum. All parameters and corresponding prior ranges are given in Suppl. Inf. Table 2. To convert  
 488 the natural logarithm of the Bayes factors,  $\Delta\log(Z)$ , into a rejection significance we use the for-  
 489 malism presented in ref. <sup>97</sup>. A full corner plot showing the posterior distribution for all retrieval  
 490 parameters is shown in Suppl. Inf. Figure 11

### 491 3.3. Silicate cloud detection significance

In order to determine the significance of the silicate cloud contribution to the retrieval we compare  
 the Bayesian evidence to that of a retrieval performed using a parameterised cloud setup and to a  
 retrieval using an atmospheric setup without clouds. The parameterised cloud setup uses exactly  
 the same cloud structure but a wavelength-dependent opacity characterised by

$$\kappa(\lambda) \propto (1 + (\lambda/\lambda_0)^p)^{-1}, \quad (3)$$

492 with the two parameters  $\lambda_0$  and  $p$  being retrieval parameters. Eq. (3) captures the expected be-  
 493 haviour of cloud opacities, being largely constant at short wavelengths (cut-off set by the wave-  
 494 length  $\lambda_0$ ) and having a slope at large wavelengths (set by the dimensionless parameter  $p$ ). The  
 495 Bayes factor of the silicate cloud model with respect to the parameterised cloud model tells us if  
 496 the 10  $\mu\text{m}$  silicate feature is required to fit the data. The comparison of the silicate cloud model  
 497 to the model without clouds tells us if clouds are needed at all in the atmosphere. Furthermore,  
 498 using `ARCIS`, we compare the cloud setup with only a single cloud component. The results are  
 499 summarised in Suppl. Inf. Table 3. As can be seen, all setups including any silicate component (ei-  
 500 ther  $\text{SiO}$ ,  $\text{SiO}_2$  or  $\text{MgSiO}_3$ ) are preferred over simplified setups. The cloud containing only carbon  
 501 opacity acts very similar to our parameterised opacity as it only provides a featureless continuum.  
 502 It is therefore preferred over no clouds but not preferred over the parameterised setup. We also  
 503 tested the significance of the silicate cloud setup for the other two data reductions, with `TEATRO`  
 504 and `Eureka!`, and find also these reductions provide strong detections of silicate clouds.

505 To investigate how sensitive our silicate cloud detection is to specific wavelength regions in



Suppl. Inf. – Figure 11: **Full corner plot for the retrieval of the transit spectrum with the petitRADTRANS setup.** The posterior distribution is shown for all retrieval parameters. Gas absorber abundances are shown in logarithms (base 10) of the volume mixing ratios, while the cloud abundance at the cloud deck is given in  $\log_{10}$  mass fractions.

506 the MIRI spectrum, we performed the analysis described above for either the full MIRI wavelength  
 507 range and additionally using only the MIRI spectrum up to a given wavelength  $\lambda_{\max}$ . With this  
 508 exercise we aim to establish the robustness of our retrieved cloud setup acknowledging ongoing



Suppl. Inf. – Table 2: **Parameters and prior ranges used in the ARCiS and petitRADTRANS (pRT) retrieval analysis.**

| Parameter                                   | Prior range                   |                               | Prior type  |
|---------------------------------------------|-------------------------------|-------------------------------|-------------|
|                                             | ARciS                         | pRT                           |             |
| T at 1 bar [K]                              | 100 – 2000                    | 200 – 2000                    | linear      |
| $d \log T / d \log P$                       | –0.1 – 0.1                    | 0 <sup>(a)</sup>              | linear      |
| $R_p [R_{\text{Jup}}]$                      | 0.7 – 1.14                    | 0.7 – 2.0                     | linear      |
| $\log_{10}(g)$ (cgs units)                  | 2.47 <sup>(a)</sup>           | $2.43 \pm 0.05$               | Gaussian    |
| Molecular abundances                        | $10^{-12} - 1$ <sup>(b)</sup> | $10^{-10} - 1$ <sup>(c)</sup> | logarithmic |
| <b>Cloud properties</b>                     |                               |                               |             |
| $P_0$ [bar]                                 | $10^{-5} - 10^3$              | -                             | logarithmic |
| $\sigma_P$                                  | 0.1 – 10                      | -                             | logarithmic |
| $\tau_{\text{cloud}}$                       | $10^{-4} - 10^3$              | -                             | logarithmic |
| $a_{\text{cloud}} [\mu\text{m}]$            | $10^{-2} - 10$                | -                             | logarithmic |
| $f_{\text{max}}$                            | 0 – 1                         | -                             | linear      |
| Material mass fractions                     | 0 – 1                         | -                             | linear      |
| $f_{\text{coverage}}$                       | 0 – 1                         | -                             | linear      |
| $P_{\text{base}}$ [bar] per material        | -                             | $10^{-6} - 10^3$              | logarithmic |
| $X_{\text{base}}$ per material              | -                             | $10^{-10} - 1$                | logarithmic |
| $f_{\text{sed}}$                            | -                             | 0 – 10                        | linear      |
| $K_{\text{zz}} [\text{cm}^2 \text{s}^{-1}]$ | -                             | $10^5 - 10^{13}$              | logarithmic |
| $x_\sigma$                                  | -                             | $10^{-2} - 1$                 | logarithmic |

<sup>(a)</sup> fixed value. <sup>(b)</sup> volume mixing ratio. <sup>(c)</sup> mass fraction.

509 discussions in the community on potential higher systematic errors for MIRI transit depths at  
510 longer wavelengths. We emphasise here that in our data we see no indications of any shadowed  
511 region that would increase the systematic errors for wavelengths between 10 and  $\sim 12 \mu\text{m}$ .

512 It is expected that the significance of the silicate detection drops quickly if we exclude all  
513 wavelengths longer than  $10 \mu\text{m}$  because this is where the silicate feature is present (see Suppl. Inf. Fig-  
514 ure 12). In Extended Data Figure 5 we show the resulting detection significance as a function of the  
515 maximum wavelength used in the analysis. It is clear that clouds are required no matter what wave-  
516 length range we choose. As expected, if we remove the entire wavelength range where the silicate  
517 feature is present (so wavelengths above  $9.5 \mu\text{m}$ ) the silicate clouds are no longer detected. In these  
518 cases it is seen that the model prefers the setup with fewer parameters, which is the parameterised  
519 cloud setup.

520 Silicate clouds are preferred with a significance of  $5.7\sigma$  even if we remove all MIRI obser-  
521 vation with wavelengths longer than  $10 \mu\text{m}$ . This significance quickly increases if we increase the

Suppl. Inf. – Table 3: **Significance of improvement of the fit with `ARCIS` for various cloud setups with respect to no clouds or with respect to clouds with a parameterised opacity.**

| Setup                                              | CASCADE      | TEATRO            | Eureka!           |
|----------------------------------------------------|--------------|-------------------|-------------------|
| With respect to no cloud                           |              |                   |                   |
| All cloud components                               | $9.2\sigma$  | -( <sup>a</sup> ) | -( <sup>a</sup> ) |
| Parameterised opacity                              | $6.0\sigma$  | -( <sup>a</sup> ) | -( <sup>a</sup> ) |
| Only SiO                                           | $9.7\sigma$  | -( <sup>a</sup> ) | -( <sup>a</sup> ) |
| Only SiO <sub>2</sub>                              | $7.7\sigma$  | -( <sup>a</sup> ) | -( <sup>a</sup> ) |
| Only MgSiO <sub>3</sub>                            | $8.8\sigma$  | -( <sup>a</sup> ) | -( <sup>a</sup> ) |
| Only carbon                                        | $5.8\sigma$  | -( <sup>a</sup> ) | -( <sup>a</sup> ) |
| With respect to a cloud with parameterised opacity |              |                   |                   |
| All cloud components                               | $7.2\sigma$  | $7.6\sigma$       | $5.2\sigma$       |
| Only SiO                                           | $7.8\sigma$  | -( <sup>a</sup> ) | -( <sup>a</sup> ) |
| Only SiO <sub>2</sub>                              | $5.1\sigma$  | -( <sup>a</sup> ) | -( <sup>a</sup> ) |
| Only MgSiO <sub>3</sub>                            | $6.6\sigma$  | -( <sup>a</sup> ) | -( <sup>a</sup> ) |
| Only carbon                                        | $-2.2\sigma$ | -( <sup>a</sup> ) | -( <sup>a</sup> ) |

(<sup>a</sup>) not tested.

522 maximum wavelength used in the analysis showing that the detection of silicate clouds is a robust  
523 result.

## 524 4. (Photo)chemical models

### 525 4.1. (Photo)chemical model setup

526 The goal of the forward (photo)chemical models is to understand the gas-phase formation of  
527 molecules in the atmosphere of WASP-107b and to derive the sensitivity of the predicted molar  
528 fractions on the model’s input parameters. Since the primary focus is on the gas-phase formation  
529 of SO<sub>2</sub>, CH<sub>4</sub>, and H<sub>2</sub>O, no cloud-formation processes have been included in these models.

530 In the case of WASP-107b, a tidally-locked planet with an equilibrium temperature of  $\sim 740$  K,  
531 and orbiting a K6 dwarf host star <sup>2,108</sup>, it is anticipated that there will be no significant spatial  
532 gradients in the temperature structure and zonal wind speeds <sup>109</sup>. Consequently, we adopt a one-  
533 dimensional configuration to examine the chemical abundance distribution within the atmosphere  
534 of WASP-107b.

535 The forward chemical models <sup>110</sup> for WASP-107b were computed considering a host star  
536 radius,  $R_*$ , of  $0.676 R_\odot$ , a planet radius  $R_p$  of  $0.94 R_J$ , and a planet mass  $M_p$  of  $30.51 M_\oplus$  <sup>108</sup>. The



Suppl. Inf. – Figure 12: **Comparison of the extinction coefficient of the silicate cloud particles with the transit spectrum of WASP-107b.** The extinction curves are computed for  $0.01 \mu\text{m}$  solid particles for SiO (red), SiO<sub>2</sub> (green) and MgSiO<sub>3</sub> (blue), representative of the particle size found by the ARCS retrievals. The pink curve is computed using a size distribution of particles between  $0.1$  and  $2 \mu\text{m}$  and a porosity of  $0.25$  (representative of the particles found by the pRT retrievals).

537 temperature-pressure profile ( $T$ - $P$ ) has been computed using the analytical equation derived by  
 538 ref. <sup>32</sup>, assuming an infrared (IR) atmosphere opacity  $\kappa_{\text{IR}} = 0.01$ , a ratio between optical and IR  
 539 opacity  $\gamma = 0.4$ , an equilibrium temperature  $T_{\text{eq}} = 740 \text{ K}$ , and an intrinsic temperature,  $T_{\text{int}}$ , in the  
 540 range of  $250 - 600 \text{ K}$ . Vertical mixing in 1D chemical models is commonly parameterized by eddy  
 541 diffusion. However, for exoplanets, the eddy diffusion coefficient  $K_{zz}$  is loosely defined <sup>109</sup>. For  
 542 the 1D photochemical models used in this work, we assume a constant  $K_{zz}$ , with values varying  
 543 between  $10^8 - 10^{11} \text{ cm}^2 \text{ s}^{-1}$ . We explore a range of C/O ratios, from solar ( $0.55$ ) to sub-solar ( $0.1$ ),  
 544 the lower limit informed by planet formation models <sup>112</sup> that predict a C/O ratio for the planet above  
 545  $\sim 0.15$ . Our base model used in Extended Data Figure 3 has an intrinsic temperature of  $400 \text{ K}$ , a  
 546 solar C/O ratio, a metallicity of  $10\times$  solar, and a  $\log_{10}(K_{zz}, \text{cgs}) = 10$ .

547 Our 1D chemical kinetics model treats thermochemical and photochemical reactions. The  
 548 thermochemical network is based on the C-H-N-O-S network from VULCAN <sup>9</sup> for reduced at-  
 549 mospheres containing 89 neutral C-, H-, O-, N-, and S-bearing species and 1028 total thermochem-  
 550 ical reactions (i.e., 514 forward-backward pairs) <sup>114</sup>. The photo-absorption cross sections are taken  
 551 from the KIDA database <sup>115</sup> and complemented with additional sulphur photo-absorption cross

552 sections (O. Venot, private communication). The full network cross sections were benchmarked  
553 against WASP-39b<sup>10</sup>.

554 The chemical model predictions are sensitive to the flux impinging the outer atmosphere.  
555 To simulate the spectral energy distribution (SED) of the host star WASP-107, we take the stellar  
556 spectrum of HD 85512, which is of similar spectral type (K6 V) and for which a panchromatic SED  
557 was constructed in the MUSCLES survey<sup>34</sup>. Being both K6 dwarf stars, the bolometric luminosity  
558 of both SEDs is similar, but the chromospheric and coronal activity can differ between both stars.  
559 To assess that difference, we observed contemporaneously with the JWST observations, the Near-  
560 Ultraviolet (NUV) emission of the host star WASP-107 with *Neil Gehrels Swift*. We also reanalysed  
561 the X-ray emission observed with *XMM-Newton* in 2018. The measured flux densities incident on  
562 WASP-107b yields a NUV flux value that is  $\sim 6.4 \text{ erg cm}^{-2} \text{ s}^{-1} \text{ \AA}^{-1}$  and an X-ray flux value that  
563 is  $\sim 1 \times 10^3 \text{ erg cm}^{-2} \text{ s}^{-1}$ ; see Sect. 2.1–2.2. The folding of the MUSCLES HD 85512 spectrum  
564 with the *Swift* filter transmission curve yields a value that is lower by only  $\sim 30\%$  compared to  
565 WASP-107, while the X-ray emission of HD 85512 is lower by a factor of  $\sim 20$ . The rotation  
566 period of  $\sim 47$  days<sup>118</sup> implies an age of  $\sim 5.6$  Gyr for HD 85512, hence considerably older than  
567 WASP-107 with an estimated age of  $\sim 3.4$  Gyr<sup>2</sup>. Therefore, it is not unexpected that HD 85512  
568 is significantly less magnetic and/or has less coronal activity than WASP-107. However, for our  
569 photochemical models mainly the NUV and FUV flux is of importance, since the X-ray emission  
570 primarily impacts photoionization which is not included in our models. We therefore can use the  
571 MUSCLES HD 85512 spectrum as representation of WASP-107’s SED.

572 Each chemical model was executed with a vertical resolution comprising 130 layers span-  
573 ning the pressure range from  $10^{-7}$  to 100 bar. Subsequently, the hydrodynamical input and the  
574 abundances resulting from the chemical kinetics simulations are used to compute a synthetic trans-  
575 mission spectrum, using the radiative transfer package `petitRADTRANS`<sup>14</sup> (see above). Next to  
576 the line absorption opacities described in the `petitRADTRANS` retrieval setup, we also include  
577 the line absorption opacities listed in ref. 109. Since the primary goal of the forward model compu-  
578 tations is to understand the gas-phase formation of SO<sub>2</sub>, CH<sub>4</sub> and H<sub>2</sub>O in this planet independent  
579 of cloud-formation, no condensate opacity was added in this last post-processing setup. For each  
580 pressure layer, the mean molecular weight is calculated based on the mixture that resulted from  
581 the disequilibrium chemistry models. The planetary radius at reference pressure (0.01 bar) was  
582 set to  $0.9 R_p$ . Finally, the predicted synthetic spectra are rebinned to the spectral resolution of the  
583 WASP-107b JWST MIRI data.

## 584 4.2. (Photo)chemical model predictions

585 Figure 3 provides evidence that only models incorporating photochemistry in combination with  
586 a super-solar metallicity predict a detectable level of SO<sub>2</sub> in WASP-107b. The large atmospheric  
587 scale height of WASP-107b enables highly efficient photochemical processes to operate within  
588 the  $\sim 740$  K temperature regime of this low-density planet, resulting in SO<sub>2</sub> volume mixing ratios  
589 being  $> 5 \times 10^{-7}$  at pressures between  $10^{-7} - 10^{-4}$  bar.

590 We explored the sensitivity of SO<sub>2</sub> to both the metallicity and the C/O ratio itself. Extended  
591 Data Figure 3 shows that the SO<sub>2</sub> molar fraction in the upper atmosphere of WASP-107b displays  
592 a mild sensitivity to the explored C/O ratio, increasing by a few factors as the C/O decreased  
593 from solar (0.55) to sub-solar (0.10). In contrast, the SO<sub>2</sub> molar fraction is highly sensitive to  
594 the metallicity (see Figure 3) owing to the fact that both the sulphur and oxygen abundance scale  
595 with metallicity. Our photochemical models show that SO<sub>2</sub> becomes detectable at super-solar  
596 metallicities, an effect already noted for higher temperature atmospheres<sup>17</sup>.

597 Two critical parameters influencing the detectability of SO<sub>2</sub> within a planetary atmosphere  
598 are the UV irradiation and the gravity ( $g$ ), which in turn determines the atmospheric scale height  
599 (see Extended Data Figure 1). Although the atmospheric scale height for both WASP-107b and  
600 WASP-39b is roughly equivalent (estimated at  $\sim 1 \times 10^6$  m), their gravity differs, with WASP-107b  
601 at  $\sim 260$  cm/s<sup>2</sup> and WASP-39b at  $\sim 430$  cm/s<sup>2</sup>. It is important to note that simulations of WASP-  
602 39b in previous studies were conducted at higher gravity values of 1,000 cm/s<sup>2</sup><sup>10</sup> and 2,140 m/s<sup>2</sup>  
603<sup>17</sup>. Extended Data Figure 1 juxtaposes the SO<sub>2</sub> predictions under  $g = 260$  cm/s<sup>2</sup> and  $g = 430$  cm/s<sup>2</sup>  
604 (similar to WASP-39b) and 1,000 cm/s<sup>2</sup>, where the gravity has been adapted by scaling the mass of  
605 the planet. While the increase of gravity from 260 cm/s<sup>2</sup> to 430 cm/s<sup>2</sup> only slightly alters the SO<sub>2</sub>  
606 abundance profile, a gravity of 1,000 cm/s<sup>2</sup> significantly decreases the SO<sub>2</sub> abundance at pressures  
607 between  $\sim 10^{-5}$  – 1 bar. This is attributed to the reduced efficiency of photochemistry in deeper  
608 layers of atmospheres with high gravity. Consequently, this reduction diminishes the reservoir of  
609 OH radicals necessary for the synthesis of SO<sub>2</sub>.

610 A last simulation employs a gravitational force of 260 cm/s<sup>2</sup> as well, but uses the SED of  
611 HD 85512 - as a proxy for WASP-107 - scaled by a factor 100 (brown line in Extended Data  
612 Figure 1) or the WASP-39 spectrum from Ref.<sup>10</sup> (purple line in Extended Data Figure 1) as the  
613 input stellar spectrum. The flux density originating from the host star, incident at the planet, is  
614 approximately 200 times greater for WASP-39b than for WASP-107b in the near-ultraviolet (NUV)  
615 range, and exhibits a factor of  $\sim 100$  – 1,000 in the far-ultraviolet (FUV), with comparable EUV  
616 and X-ray fluxes (see Suppl. Inf. Figure 13). Photodissociation of SO<sub>2</sub> and H<sub>2</sub>S mainly operates  
617 in the FUV, with absorption cross sections reaching around  $10^{-16}$  cm<sup>2</sup>. While the NUV absorption  
618 cross sections for SO<sub>2</sub> are about two orders of magnitude lower than in the FUV, it's worth noting  
619 that the H<sub>2</sub>S cross sections are only available up to  $\sim 250$  nm; see Suppl. Inf. Figure 13.

620 Increasing the UV irradiation with a factor 100 triggers the direct photodissociation of SO<sub>2</sub>  
621 at altitudes near  $10^{-4}$  bar. At higher altitudes, this process is somewhat counteracted by H<sub>2</sub>O pho-  
622 tolysis, generating additional OH radicals that react with S and SO to form SO<sub>2</sub> (see brown line  
623 in Extended Data Figure 1). However, when adopting the WASP-39 spectrum with its more ex-  
624 treme FUV/NUV ratio, an interesting observation emerges (purple line in Extended Data Figure 1):  
625 around  $10^{-3}$  bar, direct FUV-driven photodissociation of SO<sub>2</sub> takes place, while at altitudes near  
626  $10^{-4}$  bar, the additional destruction of H<sub>2</sub>S liberates sulphur radicals. These sulphur atoms are sub-  
627 sequently oxidized into SO<sub>2</sub>, partially offsetting the SO<sub>2</sub> loss at deeper levels. At the uppermost  
628 atmospheric levels, approximately several times  $10^{-7}$  bar, SO<sub>2</sub> undergoes photodissociation across  
629 all simulations. Hence, a low gravity together with modest UV irradiation and FUV/NUV ratio are



Suppl. Inf. – Figure 13: **Input stellar spectral energy distributions (SED) and photo-absorption cross sections.** The orange and light blue curve show the SED of HD 85512 – used as proxy for WASP-107 – and of WASP-39, with corresponding intensity values given on the left y-axis. The photo-absorption cross sections of SO<sub>2</sub>, H<sub>2</sub>O, H<sub>2</sub>S, and CH<sub>4</sub> are shown in green, pink, dark blue, and brown, respectively, with corresponding values given on the right y-axis.

630 the key ingredients for the formation of SO<sub>2</sub> in detectable amounts.

631 Extended Data Figure 3 shows that the eddy diffusion and the intrinsic temperature have  
 632 a minor impact on the abundance of SO<sub>2</sub> at those pressure levels where the MIRI SO<sub>2</sub> features  
 633 predominantly emerge, i.e. at pressures below a few times 10<sup>-5</sup> bar (see Extended Data Figure 4).  
 634 Even when excluding vertical transport in the disequilibrium models ( $K_{zz} = 0 \text{ cm}^2 \text{ s}^{-1}$ ) a significant  
 635 abundance of SO<sub>2</sub> is still predicted at pressures below a few times 10<sup>-4</sup> bar (see panel (b) in Suppl.  
 636 Inf. Figure 14), proving the crucial role of photolysis in establishing the chemical composition in  
 637 WASP-107b's atmosphere. The increase in SO<sub>2</sub> formation around 10<sup>-3</sup> bar (for  $K_{zz} = 0 \text{ cm}^2 \text{ s}^{-1}$ ,  
 638 purple line) is caused by the breaking up of H<sub>2</sub>S yielding sulphur radicals that are subsequently  
 639 oxidised. When including eddy diffusion, these sulphur atoms are redistributed through the atmo-  
 640 sphere, resulting in a SO<sub>2</sub> molar fraction depicted with the full black line.

A chemical network analysis indicated that the primary trigger for the formation of SO<sub>2</sub> in the atmosphere of WASP-39b is water photolysis<sup>10</sup>. However, at first sight, it seems that water photolysis only plays a minor role for the production of SO<sub>2</sub> in WASP-107b. This conclusion is drawn from panel (b) in Suppl. Inf. Figure 14 where we exclude water photodissociation from our photochemical models (green line). It can be seen that the influence on the predicted SO<sub>2</sub> abundance is only confined to pressures below 10<sup>-5</sup> bar. The reason for this behaviour is that H<sub>2</sub>O is predominantly photodissociated in the uppermost atmospheric layers. This is also shown in



Suppl. Inf. – Figure 14: **SO<sub>2</sub> molar fraction predictions for WASP-107b for different set-ups of the photochemical network.**

The base model (shown in black in each panel) has an intrinsic temperature of 400 K, a solar C/O ratio, a metallicity of 10× solar, a  $\log_{10}(K_{zz, \text{cgs}}) = 10$ , and uses the SED of HD 85512 - used as a proxy for WASP-107 - as input stellar spectrum. Panel (a): Predicted SO<sub>2</sub> molar fractions when all photo-absorption cross sections (black) are taken into account during the chemistry simulation, compared to predictions where only CH<sub>4</sub> (orange), NH<sub>3</sub> (light blue), H<sub>2</sub>O (dark blue), N<sub>2</sub> (green) or HNO<sub>2</sub> (brown) are used. Panel (b): Predicted SO<sub>2</sub> molar fractions without vertical mixing, i.e.  $K_{zz} = 0 \text{ cm}^2/\text{s}$  (yellow), without photodissociation of H<sub>2</sub>O (blue), and without including the thermochemical reaction  $\text{H}_2\text{O} + \text{H} \rightleftharpoons \text{H}_2 + \text{OH}$  (orange).

panel (b) of Suppl. Inf. Figure 15 where we compare the [OH]/[H] ratio under equilibrium and disequilibrium conditions. While the omission of H<sub>2</sub>O photodissociation explains the difference between both curves for pressures around a few times 10<sup>-7</sup> bar, the vertical transport is the main reason for the difference between equilibrium and disequilibrium predictions for pressures between  $\sim 10^{-4} - 1$  bar. The thermochemical reaction of main importance for establishing the [OH]/[H] ratio in that pressure regime (see panel (b) in Suppl. Inf. Figure 14) is



The reverse reaction rate,  $k_r$ , is given in the VULCAN network in its Arrhenius form

$$k_r = A_r T_r^B \exp(-C_r/T) [\text{cm}^3 \text{ s}^{-1}], \quad (5)$$

641 with  $T$  the temperature (in Kelvin), and the corresponding parameters being the pre-exponential  
 642 factor  $A_r = 3.57 \times 10^{-16} \text{ cm}^3 \text{ s}^{-1}$ , the temperature-dependent exponent  $B_r = 1.52$ , and the activa-

643 tion energy  $C_r = 1740$  K. Using the NTRS-NASA thermodynamic data<sup>120</sup> and assuming thermo-  
 644 dynamic equilibrium, the Gibbs free energy of formation of the forward reaction, and the corre-  
 645 sponding equilibrium constant can be calculated<sup>121</sup>. This allows the calculation of the forward  
 646 reaction rate  $k_f$ . Fitting these results with the Arrhenius form yields  $A_f = 1.54 \times 10^{-14} \text{ cm}^3 \text{ s}^{-1}$ ,  
 647  $B_f = 1.245$ , and a high energy barrier of  $C_f = 9468$  K. It can be seen that at the temperatures rele-  
 648 vant for planet atmospheres, the forward reaction rate is much lower than the reverse rate.



Suppl. Inf. – Figure 15: **[OH]/[H] ratio for equilibrium and disequilibrium predictions.** Panel (a): Proxy for the [OH]/[H] ratio assuming thermodynamic equilibrium and that most of the O is in  $\text{H}_2\text{O}$  at solar metallicity (blue) and at  $Z = 10 Z_{\odot}$  (orange). The prediction by Ref. <sup>10</sup> is shown as a green line for comparison. Panel (b): The molar fraction of [OH]/[H] under two conditions: solar metallicity (blue) and  $10\times$  solar metallicity (orange), is depicted in both chemical equilibrium (dashed line) and disequilibrium (solid line) calculations.

649 Similar to Ref. <sup>10</sup>, we then can calculate the [OH]/[H] ratio assuming thermodynamic equi-  
 650 librium and that most of the O is in  $\text{H}_2\text{O}$ . This yields panel (a) in Suppl. Inf. Figure 15, to be  
 651 compared with Extended Data Figure 10 of Ref. <sup>10</sup>. At temperatures below  $\sim 750$  K, the [OH]/[H]  
 652 ratio drops below  $\sim 2 \times 10^{-6}$  for  $Z = 10 Z_{\odot}$ , and hence a factor 10 lower at solar metallicity. This  
 653 scarcity of OH has been used as an argument for the lack of  $\text{SO}_2$  formation at equilibrium temper-  
 654 atures below approximately  $\sim 1,000$  K for a planet with WASP-39b parameters, favouring instead  
 655 the prevalence of sulphur allotropes  $\text{S}_x$ <sup>10</sup>.

656 The central inquiry that emerges is how  $\text{SO}_2$  can be created within the atmosphere of WASP-  
 657 107b if the aforementioned argument stands. The solution becomes evident through Suppl. Inf.  
 658 Figure 14, where it is demonstrated that the photodissociation of various specific abundant molecules  
 659 sparks the generation of  $\text{SO}_2$ . This assertion is exemplified in panel (a) of Suppl. Inf. Figure 14,  
 660 where the photodissociation of either only  $\text{H}_2\text{O}$  (or only  $\text{N}_2$  or  $\text{NH}_3$ ) leads to the emergence of  $\text{SO}_2$ .  
 661 But the photodissociation of only  $\text{CH}_4$  (only acting at wavelengths  $\lesssim 140$  nm; see Suppl. Inf. Fig-  
 662 ure 13) yields negligible amounts of  $\text{SO}_2$ , while the photodissociation of the rare molecule  $\text{HNO}_2$



663 yields outcomes consistent with chemical equilibrium predictions, wherein all photodissociation is  
664 thus excluded (see dotted line in panel (b) of Figure 3). This phenomenon arises from the fact that  
665 the photodissociation of various specific abundant molecules releases atoms and radicals that in-  
666 duce a very active photochemistry even down to pressure layers of approximately 1 bar. Reactions  
667 involving the liberated atoms and radicals often display temperature-independent behaviour with-  
668 out energy barriers (i.e.,  $B = C = 0$ ) and possess pre-exponential factors typically on the order of  
669  $10^{-11} - 10^{-7} \text{ cm}^3 \text{ s}^{-1}$ . Consequently, a significant amount of H atoms and OH radicals is formed,  
670 leading to the oxidation of sulphur into  $\text{SO}_2$ . Hence, although the photolysis of  $\text{H}_2\text{O}$  can initiate  
671 the production of  $\text{SO}_2$  in WASP-107b, it is not the sole molecule whose photodissociation holds  
672 the potential to induce  $\text{SO}_2$  formation.

673 In summary, the overarching scenario that unfolds reveals that the primary pathways initi-  
674 ating the formation of  $\text{SO}_2$  in the low-density atmosphere of WASP-107b are twofold. Firstly,  
675 through the photodissociation of  $\text{H}_2\text{O}$  in the upper atmospheric layers at pressures below a few  
676 times  $10^{-6}$  bar, yielding atomic H and OH radicals. These OH radicals are key for oxidising sul-  
677 phur that is liberated from  $\text{H}_2\text{S}$ . Secondly, in the pressure range of  $10^{-5} - 1$  bar, the prevailing  
678 determinant of the chemical composition is the interplay of photochemical processes acting upon  
679 various abundant molecules, not limited to  $\text{H}_2\text{O}$ . These processes can generate a sufficiently sub-  
680 stantial quantity of free atoms and radicals, that can be redistributed through eddy diffusion. This  
681 initiates a cascade of barrierless thermochemical reactions that progressively culminate in the for-  
682 mation of  $\text{SO}_2$ . Given the fact that a large ensemble of those reactions are temperature-independent,  
683 the equilibrium temperature stands as just one among several factors dictating the formation (or  
684 not) of  $\text{SO}_2$ . As long as the UV irradiation and FUV/NUV ratio remain moderate and the gravity is  
685 low, these processes will lead to the formation of  $\text{SO}_2$  in sufficient amounts to be detectable even  
686 within a  $\sim 740$  K temperature planet.

## 687 **Supplementary References**

- 688 35. Kendrew, S. *et al.* The Mid-Infrared Instrument for the James Webb Space Telescope, IV: The  
689 Low-Resolution Spectrometer. *Pub. Astron. Soc. Pacific* **127**, 623 (2015).
- 690 36. Rieke, G. H. *et al.* The Mid-Infrared Instrument for the James Webb Space Telescope, I:  
691 Introduction. *Pub. Astron. Soc. Pacific* **127**, 584 (2015).
- 692 37. Ressler, M. E. *et al.* The Mid-Infrared Instrument for the James Webb Space Telescope, VIII:  
693 The MIRI Focal Plane System. *Pub. Astron. Soc. Pacific* **127**, 675 (2015).
- 694 38. Bouwman, J. *et al.* Spectroscopic Time Series Performance of the Mid-infrared Instrument on  
695 the JWST. *Pub. Astron. Soc. Pacific* **135**, 038002 (2023).
- 696 39. Bell, T. *et al.* Eureka!: An End-to-End Pipeline for JWST Time-Series Observations. *The*  
697 *Journal of Open Source Software* **7**, 4503 (2022).
- 698 40. Bell, T. J. *et al.* A First Look at the JWST MIRI/LRS Phase Curve of WASP-43b (2023).

- 699 41. Anderson, D. R., Collier Cameron, A. & Delrez, L. The discoveries of WASP-91b, WASP-  
700 105b and WASP-107b: Two warm Jupiters and a planet in the transition region between ice  
701 giants and gas giants. *Astron. Astrophys.* **604**, A110 (2017).
- 702 42. Ivshina, E. S. & Winn, J. N. TESS Transit Timing of Hundreds of Hot Jupiters. *Astrophys. J.*  
703 *Suppl.* **259**, 62 (2022).
- 704 43. Dai, F. & Winn, J. N. The Oblique Orbit of WASP-107b from K2 Photometry. *Astron. J.* **153**,  
705 205 (2017).
- 706 44. Morello, G. *et al.* The ExoTETHyS Package: Tools for Exoplanetary Transits around Host  
707 Stars. *Astron. J.* **159**, 75 (2020).
- 708 45. Kipping, D. M. Efficient, uninformative sampling of limb darkening coefficients for two-  
709 parameter laws. *Mon. Not. Roy. Astron. Soc.* **435**, 2152–2160 (2013).
- 710 46. Piaulet, C. *et al.* WASP-107b’s Density Is Even Lower: A Case Study for the Physics of  
711 Planetary Gas Envelope Accretion and Orbital Migration. *Astron. J.* **161**, 70 (2021).
- 712 47. Morrison, J. JWST MIRI flight performance: Detector Effects and Data Reduction Algo-  
713 rithms. *in prep.* (2023).
- 714 48. Carone, L. *et al.* Indications for very high metallicity and absence of methane in the eccentric  
715 exo-Saturn WASP-117b. *Astron. Astrophys.* **646**, A168 (2021).
- 716 49. Argyriou, I. Calibration of the MIRI instrument on board the James Webb Space Telescope  
717 (2021).
- 718 50. Foreman-Mackey, D., Hogg, D. W., Lang, D. & Goodman, J. emcee: The MCMC Hammer.  
719 *Pub. Astron. Soc. Pacific* **125**, 306 (2013).
- 720 51. Kreidberg, L. batman: BASic Transit Model cAlculatioN in Python. *Pub. Astron. Soc. Pacific*  
721 **127**, 1161 (2015).
- 722 52. Kumar, R., Carroll, C., Hartikainen, A. & Martin, O. A. ArviZ a unified library for exploratory  
723 analysis of Bayesian models in Python. *The Journal of Open Source Software* (2019).
- 724 53. Foreman-Mackey, D. *et al.* exoplanet: Gradient-based probabilistic inference for exoplanet  
725 data & other astronomical time series. *The Journal of Open Source Software* **6**, 3285 (2021).
- 726 54. Argyriou, I. *et al.* The Brighter-Fatter Effect in the JWST MIRI Si:As IBC detectors I. Obser-  
727 vations, impact on science, and modelling. *arXiv e-prints* arXiv:2303.13517 (2023).
- 728 55. Pontoppidan, K. M. *et al.* Pandeia: a multi-mission exposure time calculator for JWST and  
729 WFIRST. In Peck, A. B., Benn, C. R. & Seaman, R. L. (eds.) *Observatory Operations:  
730 Strategies, Processes, and Systems VI*, 44 (SPIE, Edinburgh, United Kingdom, 2016).

- 731 56. Carone, L. *et al.* Equatorial retrograde flow in WASP-43b elicited by deep wind jets? *Mon.*  
732 *Not. Roy. Astron. Soc.* **496**, 3582–3614 (2020).
- 733 57. Roming, P. W. A. *et al.* The Swift Ultra-Violet/Optical Telescope. *Space Science Rev.* **120**,  
734 95–142 (2005).
- 735 58. Salz, M. *et al.* Swift UVOT near-UV transit observations of WASP-121 b. *Astron. Astrophys.*  
736 **623**, A57 (2019).
- 737 59. Poole, T. S. *et al.* Photometric calibration of the Swift ultraviolet/optical telescope: Photomet-  
738 ric calibration of the Swift UVOT. *Mon. Not. Roy. Astron. Soc.* **383**, 627–645 (2007).
- 739 60. Bertin, E. & Arnouts, S. SExtractor: Software for source extraction. *Astron. Astrophys. Suppl.*  
740 **117**, 393–404 (1996).
- 741 61. Taylor, M. B. TOPCAT & STIL: Starlink Table/VOTable Processing Software. In Shopbell,  
742 P., Britton, M. & Ebert, R. (eds.) *Astronomical Data Analysis Software and Systems XIV*, vol.  
743 347 of *Astron. Soc. Pacific Conf. Series*, 29 (2005).
- 744 62. Breeveld, A. A. *et al.* An Updated Ultraviolet Calibration for the Swift/UVOT. In McEnery,  
745 J. E., Racusin, J. L. & Gehrels, N. (eds.) *Gamma Ray Bursts 2010*, vol. 1358 of *American*  
746 *Institute of Physics Conference Series*, 373–376 (2011).
- 747 63. Woods, T. N. *et al.* Solar Irradiance Reference Spectra (SIRS) for the 2008 Whole Heliosphere  
748 Interval (WHI). *Geophys. Res. Lett.* **36**, L01101 (2009).
- 749 64. Strüder, L. *et al.* The European Photon Imaging Camera on XMM-Newton: The pn-CCD  
750 camera. *Astron. Astrophys.* **365**, L18–L26 (2001).
- 751 65. Turner, M. J. L. *et al.* The European Photon Imaging Camera on XMM-Newton: The MOS  
752 cameras. *Astron. Astrophys.* **365**, L27–L35 (2001).
- 753 66. Webb, N. A. *et al.* The XMM-Newton serendipitous survey: IX. The fourth XMM-Newton  
754 serendipitous source catalogue. *Astron. Astrophys.* **641**, A136 (2020).
- 755 67. Nortmann, L. *et al.* Ground-based detection of an extended helium atmosphere in the Saturn-  
756 mass exoplanet WASP-69b. *Science* **362**, 1388–1391 (2018).
- 757 68. Foster, G., Poppenhaeger, K., Ilic, N. & Schwobe, A. Exoplanet X-ray irradiation and evapo-  
758 ration rates with eROSITA. *Astron. Astrophys.* **661**, A23 (2022).
- 759 69. Spinelli, R. *et al.* Planetary Parameters, XUV Environments, and Mass-loss Rates for Nearby  
760 Gaseous Planets with X-Ray-detected Host Stars. *Astron. J.* **165**, 200 (2023).
- 761 70. Arnaud, K. A. XSPEC: The First Ten Years. In Jacoby, G. H. & Barnes, J. (eds.) *Astronomical*  
762 *Data Analysis Software and Systems V*, vol. 101 of *Astron. Soc. Pacific Conf. Series*, 17 (1996).

- 763 71. Johnstone, C. P. & Güdel, M. The coronal temperatures of low-mass main-sequence stars.  
764 *Astron. Astrophys.* **578**, A129 (2015).
- 765 72. Močnik, T., Hellier, C., Anderson, D. R., Clark, B. J. M. & Southworth, J. Starspots on WASP-  
766 107 and pulsations of WASP-118. *Mon. Not. Roy. Astron. Soc.* **469**, 1622–1629 (2017).
- 767 73. Johnstone, C. P., Bartel, M. & Güdel, M. The active lives of stars: A complete description  
768 of the rotation and XUV evolution of F, G, K, and M dwarfs. *Astron. Astrophys.* **649**, A96  
769 (2021).
- 770 74. Kreidberg, L., Line, M. R., Thorngren, D., Morley, C. V. & Stevenson, K. B. Water, High-  
771 altitude Condensates, and Possible Methane Depletion in the Atmosphere of the Warm Super-  
772 Neptune WASP-107b. *Astrophys. J. Lett.* **858**, L6 (2018).
- 773 75. Min, M., Ormel, C. W., Chubb, K., Helling, C. & Kawashima, Y. The ARCiS framework  
774 for exoplanet atmospheres. Modelling philosophy and retrieval. *Astron. Astrophys.* **642**, A28  
775 (2020).
- 776 76. Mollière, P. *et al.* petitRADTRANS. A Python radiative transfer package for exoplanet char-  
777 acterization and retrieval. *Astron. Astrophys.* **627**, A67 (2019).
- 778 77. Polyansky, O. L. *et al.* ExoMol molecular line lists XXX: a complete high-accuracy line list  
779 for water. *Mon. Not. Roy. Astron. Soc.* **480**, 2597–2608 (2018).
- 780 78. Rothman, L. S. *et al.* HITEMP, the high-temperature molecular spectroscopic database. *J.*  
781 *Quant. Spectrosc. Radiat. Transfer* **111**, 2139–2150 (2010).
- 782 79. Yurchenko, S. N., Mellor, T. M., Freedman, R. S. & Tennyson, J. ExoMol line lists – XXXIX.  
783 Ro-vibrational molecular line list for CO<sub>2</sub>. *Mon. Not. Roy. Astron. Soc.* **496**, 5282–5291  
784 (2020).
- 785 80. Yurchenko, S. N., Amundsen, D. S., Tennyson, J. & Waldmann, I. P. A hybrid line list for  
786 CH<sub>4</sub> and hot methane continuum. *Astron. Astrophys.* **605**, A95 (2017).
- 787 81. Chubb, K. L., Tennyson, J. & Yurchenko, S. N. ExoMol molecular line lists - XXXVII. Spectra  
788 of acetylene. *Mon. Not. Roy. Astron. Soc.* **493**, 1531–1545 (2020).
- 789 82. Underwood, D. S. *et al.* ExoMol molecular line lists – XIV. The rotation–vibration spectrum  
790 of hot SO<sub>2</sub>. *Mon. Not. Roy. Astron. Soc.* **459**, 3890–3899 (2016).
- 791 83. Bernath, P. F., Johnson, R. M. & Liévin, J. Line lists for X<sup>3</sup>Σ<sup>-</sup> and a<sup>1</sup>Δ vibration-rotation  
792 bands of SO. *J. Quant. Spectrosc. Radiat. Transfer* **290**, 108317 (2022).
- 793 84. Azzam, A. A. A., Tennyson, J., Yurchenko, S. N. & Naumenko, O. V. ExoMol molecular line  
794 lists – XVI. The rotation–vibration spectrum of hot H<sub>2</sub>S. *Mon. Not. Roy. Astron. Soc.* **460**,  
795 4063–4074 (2016).

- 796 85. Barton, E. J., Yurchenko, S. N. & Tennyson, J. ExoMol line lists – II. The ro-vibrational  
797 spectrum of SiO. *Mon. Not. Roy. Astron. Soc.* **434**, 1469–1475 (2013).
- 798 86. Barber, R. J. *et al.* ExoMol line lists – III. An improved hot rotation-vibration line list for  
799 HCN and HNC. *Mon. Not. Roy. Astron. Soc.* **437**, 1828–1835 (2013).
- 800 87. Coles, P. A., Yurchenko, S. N. & Tennyson, J. ExoMol molecular line lists – XXXV. A  
801 rotation-vibration line list for hot ammonia. *Mon. Not. Roy. Astron. Soc.* **490**, 4638–4647  
802 (2019).
- 803 88. Sousa-Silva, C., Al-Refaie, A. F., Tennyson, J. & Yurchenko, S. N. ExoMol line lists – VII.  
804 The rotation–vibration spectrum of phosphine up to 1500 K. *Mon. Not. Roy. Astron. Soc.* **446**,  
805 2337–2347 (2014).
- 806 89. Chubb, K. L. *et al.* The ExoMolOP database: Cross sections and k-tables for molecules of  
807 interest in high-temperature exoplanet atmospheres. *Astron. Astrophys.* **646**, A21 (2021).
- 808 90. Jäger, C., Dorschner, J., Mutschke, H., Posch, T. & Henning, T. Steps toward interstellar sili-  
809 cate mineralogy. VII. Spectral properties and crystallization behaviour of magnesium silicates  
810 produced by the sol-gel method. *Astron. Astrophys.* **408**, 193–204 (2003).
- 811 91. Henning, T. & Mutschke, H. Low-temperature infrared properties of cosmic dust analogues.  
812 *Astron. Astrophys.* **327**, 743–754 (1997).
- 813 92. Palik, E. *Handbook of Optical Constants of Solids*. Bd. 1 (Elsevier Science, 2012).
- 814 93. Kitzmann, D. & Heng, K. Optical properties of potential condensates in exoplanetary atmo-  
815 spheres. *Mon. Not. Roy. Astron. Soc.* **475**, 94–107 (2018).
- 816 94. Wetzel, S., Klevenz, M., Gail, H. P., Pucci, A. & Trieloff, M. Laboratory measurement of  
817 optical constants of solid SiO and application to circumstellar dust. *Astron. Astrophys.* **553**,  
818 A92 (2013).
- 819 95. Zubko, V. G., Mennella, V., Colangeli, L. & Bussoletti, E. Optical constants of cosmic carbon  
820 analogue grains - I. Simulation of clustering by a modified continuous distribution of ellip-  
821 soids. *Mon. Not. Roy. Astron. Soc.* **282**, 1321–1329 (1996).
- 822 96. Min, M., Hovenier, J. W. & de Koter, A. Modeling optical properties of cosmic dust grains  
823 using a distribution of hollow spheres. *Astron. Astrophys.* **432**, 909–920 (2005).
- 824 97. Benneke, B. & Seager, S. How to Distinguish between Cloudy Mini-Neptunes and  
825 Water/Volatile-Dominated Super-Earths. *Astrophys. J.* **778**, 153 (2013).
- 826 98. Dalgarno, A. & Williams, D. A. Rayleigh Scattering by Molecular Hydrogen. *Astrophys. J.*  
827 **136**, 690–692 (1962).
- 828 99. Chan, Y. M. & Dalgarno, A. The refractive index of helium. *Proceedings of the Physical*  
829 *Society* **85**, 227 (1965).

- 830 100. Borysow, J., Frommhold, L. & Birnbaum, G. Collision-induced rototranslational absorption  
831 spectra of H<sub>2</sub>-He pairs at temperatures from 40 to 3000 K. *Astrophys. J.* **326**, 509–515 (1988).
- 832 101. Borysow, A., Frommhold, L. & Moraldi, M. Collision-induced infrared spectra of H<sub>2</sub>-He  
833 pairs involving 0-1 vibrational transitions and temperatures from 18 to 7000 K. *Astrophys. J.*  
834 **336**, 495–503 (1989).
- 835 102. Borysow, A. & Frommhold, L. Collision-induced infrared spectra of H<sub>2</sub>-He pairs at temper-  
836 atures from 18 to 7000 K. II - Overtone and hot bands. *Astrophys. J.* **341**, 549–555 (1989).
- 837 103. Borysow, A., Jorgensen, U. G. & Fu, Y. High-temperature (1000-7000 K) collision-induced  
838 absorption of H<sub>2</sub> pairs computed from the first principles, with application to cool and dense  
839 stellar atmospheres. *J. Quant. Spectrosc. Radiat. Transfer* **68**, 235–255 (2001).
- 840 104. Borysow, A. Collision-induced absorption coefficients of H<sub>2</sub> pairs at temperatures from 60  
841 K to 1000 K. *Astron. Astrophys.* **390**, 779–782 (2002).
- 842 105. Richard, C. *et al.* New section of the HITRAN database: Collision-induced absorption (CIA).  
843 *J. Quant. Spectrosc. Radiat. Transfer* **113**, 1276–1285 (2012).
- 844 106. Scott, A. & Duley, W. W. Ultraviolet and Infrared Refractive Indices of Amorphous Silicates.  
845 *Astrophys. J. Suppl.* **105**, 401 (1996).
- 846 107. Ackerman, A. S. & Marley, M. S. Precipitating Condensation Clouds in Substellar Atmo-  
847 spheres. *Astrophys. J.* **556**, 872–884 (2001).
- 848 108. Hejazi, N. *et al.* Elemental Abundances of the Super-Neptune WASP-107b’s Host Star Using  
849 High-resolution, Near-infrared Spectroscopy. *The Astrophysical Journal* **949**, 79 (2023).
- 850 109. Baeyens, R. *et al.* Grid of pseudo-2D chemistry models for tidally locked exoplanets - I. The  
851 role of vertical and horizontal mixing. *Mon. Not. Roy. Astron. Soc.* **505**, 5603–5653 (2021).
- 852 110. Agúndez, M., Venot, O., Selsis, F. & Iro, N. The Puzzling Chemical Composition of GJ  
853 436b’s Atmosphere: Influence of Tidal Heating on the Chemistry. *Astrophys. J.* **781**, 68 (2014).
- 854 111. Guillot, T. On the radiative equilibrium of irradiated planetary atmospheres. *Astron. Astro-  
855 phys.* **520**, A27 (2010).
- 856 112. Khorshid, N., Min, M., Désert, J. M., Woitke, P. & Dominik, C. SimAb: A simple, fast, and  
857 flexible model to assess the effects of planet formation on the atmospheric composition of gas  
858 giants. *Astron. Astrophys.* **667**, A147 (2022).
- 859 113. Tsai, S.-M., Malik, M. & Kitzmann, D. A Comparative Study of Atmospheric Chemistry  
860 with VULCAN. *Astrophys. J.* **923**, 264 (2021).
- 861 114. Baeyens, R., Désert, J.-M., Petrigani, A., Carone, L. & Schneider, A. D. Photodissociation  
862 and induced chemical asymmetries on ultra-hot gas giants. A case study of HCN on WASP-76  
863 b. *arXiv e-prints* arXiv:2309.00573 (2023).

- 864 115. Venot, O. *et al.* New chemical scheme for giant planet thermochemistry. Update of the  
865 methanol chemistry and new reduced chemical scheme. *Astron. Astrophys.* **634**, A78 (2020).
- 866 116. Tsai, S.-M. *et al.* Photochemically produced SO<sub>2</sub> in the atmosphere of WASP-39b. *Nature*  
867 **617**, 483–487 (2023).
- 868 117. Loyd, R. O. P. *et al.* The MUSCLES Treasury Survey. III. X-Ray to Infrared Spectra of 11  
869 M and K Stars Hosting Planets. *Astrophys. J.* **824**, 102 (2016).
- 870 118. France, K. *et al.* The MUSCLES Treasury Survey. I. Motivation and Overview. *Astrophys.*  
871 *J.* **820**, 89 (2016).
- 872 119. Polman, J., Waters, L. B. F. M., Min, M., Miguel, Y. & Khorshid, N. H<sub>2</sub>S and SO<sub>2</sub> de-  
873 tectability in hot Jupiters. Sulphur species as indicators of metallicity and C/O ratio. *Astron.*  
874 *Astrophys.* **670**, A161 (2023).
- 875 120. McBride, B. J., Gordon, S. & Reno, M. A. Thermodynamic data for fifty reference elements  
876 (2001).
- 877 121. Gail, H.-P. & Sedlmayr, E. *Physics and Chemistry of Circumstellar Dust Shells* (2013).
